# Supplementary material for: Incidence and clearance of oral and cervicogenital HPV infection: longitudinal analysis of the MHOC cohort study
Source: PubMed Central journal article supplement — BMJ Open. 2022 Jan 3;12(1):e056502. doi: 10.1136/bmjopen-2021-056502 (PMC8724815; doi:10.1136/bmjopen-2021-056502), 2022-01-03
Supplement: bmjopen-2021-056502.draft_revisions.pdf [file bmjopen-2021-056502.draft_revisions.pdf]

# BMJ Open

BMJ Open is committed to open peer review. As part of this commitment we make the peer review history of every article we publish publicly available.

When an article is published we post the peer reviewers' comments and the authors' responses online. We also post the versions of the paper that were used during peer review. These are the versions that the peer review comments apply to.

The versions of the paper that follow are the versions that were submitted during the peer review process. They are not the versions of record or the final published versions. They should not be cited or distributed as the published version of this manuscript.

BMJ Open is an open access journal and the full, final, typeset and author-corrected version of record of the manuscript is available on our site with no access controls, subscription charges or pay-per-view fees (<http://bmjopen.bmj.com>).

If you have any questions on BMJ Open's open peer review process please email [info.bmjopen@bmj.com](mailto:info.bmjopen@bmj.com)

# BMJ Open

## Incidence and clearance of oral and cervicogenital HPV infection: longitudinal analysis of the MHOC cohort study

|                               |                                                                                                                                                                                                                                                                                                                                                                                                                                                                                                                                                                                                                                                                                                                                                                                                                  |
|-------------------------------|------------------------------------------------------------------------------------------------------------------------------------------------------------------------------------------------------------------------------------------------------------------------------------------------------------------------------------------------------------------------------------------------------------------------------------------------------------------------------------------------------------------------------------------------------------------------------------------------------------------------------------------------------------------------------------------------------------------------------------------------------------------------------------------------------------------|
| Journal:                      | <i>BMJ Open</i>                                                                                                                                                                                                                                                                                                                                                                                                                                                                                                                                                                                                                                                                                                                                                                                                  |
| Manuscript ID                 | bmjopen-2021-056502                                                                                                                                                                                                                                                                                                                                                                                                                                                                                                                                                                                                                                                                                                                                                                                              |
| Article Type:                 | Original research                                                                                                                                                                                                                                                                                                                                                                                                                                                                                                                                                                                                                                                                                                                                                                                                |
| Date Submitted by the Author: | 16-Aug-2021                                                                                                                                                                                                                                                                                                                                                                                                                                                                                                                                                                                                                                                                                                                                                                                                      |
| Complete List of Authors:     | Brouwer, Andrew; University of Michigan, Department of Epidemiology<br>Campredon, Lora; University of Michigan, Epidemiology<br>Walline, Heather; University of Michigan, Otolaryngology<br>Marinelli, Brittany; University of Michigan, Department of Otolaryngology<br>Goudsmit, Christine; University of Michigan, Otolaryngology<br>Thomas, Trey; University of Michigan, Otolaryngology<br>Delinger, Rachel; University of Michigan, Epidemiology<br>Lau, Yan; University of Michigan, Epidemiology<br>Andrus, Emily; University of Michigan, Department of Epidemiology<br>Nair, Thankam; University of Michigan, Otolaryngology<br>Carey, Thomas; University of Michigan, Otolaryngology<br>Eisenberg, Marisa; University of Michigan, Epidemiology<br>Meza, Rafael; University of Michigan, Epidemiology |
| Keywords:                     | EPIDEMIOLOGY, GYNAECOLOGY, Epidemiology < INFECTIOUS DISEASES, OTOLARYNGOLOGY, PUBLIC HEALTH, SEXUAL MEDICINE                                                                                                                                                                                                                                                                                                                                                                                                                                                                                                                                                                                                                                                                                                    |
|                               |                                                                                                                                                                                                                                                                                                                                                                                                                                                                                                                                                                                                                                                                                                                                                                                                                  |

SCHOLARONE™  
Manuscripts

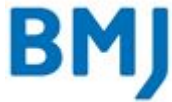

I, the Submitting Author has the right to grant and does grant on behalf of all authors of the Work (as defined in the below author licence), an exclusive licence and/or a non-exclusive licence for contributions from authors who are: i) UK Crown employees; ii) where BMJ has agreed a CC-BY licence shall apply, and/or iii) in accordance with the terms applicable for US Federal Government officers or employees acting as part of their official duties; on a worldwide, perpetual, irrevocable, royalty-free basis to BMJ Publishing Group Ltd ("BMJ") its licensees and where the relevant Journal is co-owned by BMJ to the co-owners of the Journal, to publish the Work in this journal and any other BMJ products and to exploit all rights, as set out in our [licence](#).

The Submitting Author accepts and understands that any supply made under these terms is made by BMJ to the Submitting Author unless you are acting as an employee on behalf of your employer or a postgraduate student of an affiliated institution which is paying any applicable article publishing charge ("APC") for Open Access articles. Where the Submitting Author wishes to make the Work available on an Open Access basis (and intends to pay the relevant APC), the terms of reuse of such Open Access shall be governed by a Creative Commons licence – details of these licences and which [Creative Commons](#) licence will apply to this Work are set out in our licence referred to above.

Other than as permitted in any relevant BMJ Author's Self Archiving Policies, I confirm this Work has not been accepted for publication elsewhere, is not being considered for publication elsewhere and does not duplicate material already published. I confirm all authors consent to publication of this Work and authorise the granting of this licence.

1  
2  
3 **Incidence and clearance of oral and cervicogenital HPV infection: longitudinal analysis of the MHOC**  
4 **cohort study**  
5

6  
7 **Authors:** Andrew F. Brouwer<sup>a</sup>, Lora P. Campredon<sup>a</sup>, Heather M. Walline<sup>b</sup>, Brittany M. Marinelli<sup>b</sup>,  
8  
9  
10 Christine M. Goudsmit<sup>b</sup>, Trey B. Thomas<sup>a,b</sup>, Rachel L. Delinger<sup>a</sup>, Yan Kwan Lau<sup>a</sup>, Emily C. Andrus<sup>a</sup>,  
11  
12  
13 Thankam Nair<sup>b</sup>, Thomas E. Carey<sup>b</sup>, Marisa C. Eisenberg<sup>a,†</sup>, Rafael Meza<sup>a,†</sup>  
14

15 †: These authors contributed equally.  
16

17  
18 *a*: Department of Epidemiology, University of Michigan, Ann Arbor, Michigan  
19

20  
21 *b*: Department of Otolaryngology, University of Michigan, Ann Arbor, Michigan  
22

23  
24 \*: corresponding author, brouweaf@umich.edu, 1415 Washington Heights, Department of Epidemiology,  
25  
26 Ann Arbor, MI 48109  
27

28 Word count: 2,710  
29

30  
31 **Keywords:** human papillomavirus, oral, cervicogenital, longitudinal, multistate transition model, sexual  
32  
33 behavior  
34  
35  
36  
37  
38  
39  
40  
41  
42  
43  
44  
45  
46  
47  
48  
49  
50  
51  
52  
53  
54  
55  
56  
57  
58  
59  
60

## Abstract

**Objectives:** The Michigan HPV and Oropharyngeal Cancer (MHOC) Study aimed to evaluate patterns of oral and cervicogenital HPV infection prevalence, incidence, and clearance as well as their relationship to sexual behaviors.

**Design:** Cohort

**Setting:** General public in and around Ann Arbor, MI

**Participants:** 394 college-age and older-adult participants of both sexes provided oral samples, and 325 completed at least 2 visits. 130 who provided a cervicogenital samples, and 127 completed at least 2 visits.

**Outcomes:** Incidence and clearance rates as well as hazard ratios (HR) for oral and cervicogenital HPV.

**Results:** Oral HPV infections were transient, with only 16% of genotypes persisting to the next visit. The mean time to clearance of a genotype was 46 days (95% CI: 37–58). In contrast, cervicogenital infections were more persistent, with 56% of genotypes persisting to the next visit. The mean time to clearance of a genotype was 87 days (95% CI: 74–102). HPV vaccination was associated with reduced incidence of cervicogenital HPV infection (HR: 0.63; 95% CI: 0.47, 0.83) but not oral HPV infection. Incidence of oral HPV infection was associated with 2+ recent deep kissing partners (HR: 2.00; 95% CI: 1.13, 3.56). Incidence of both oral (HR: 1.70; 95% CI: 1.08, 2.68) and cervicogenital (HR: 2.46; 95% CI 1.69, 3.59) was associated with 2+ recent sexual partners.

**Conclusions:** Detection of oral HPV was highly transient, but incidence was associated with recent deep kissing and sexual partners. Detection of cervicogenital HPV was more persistent, and incidence was positively associated with recent sexual partners and negatively associated with HPV vaccination.

## Article summary

### Strengths and limitations of this study

- This study enrolled men and women and reports on both oral and cervicogenital HPV
- This study's longitudinal cohort design allowed for inference of HPV dynamics
- This study is limited by its comparatively small sample size and convenience sample design.

## Introduction

The human papillomavirus (HPV) is the cause of virtually every cervical cancer and an increasing number and fraction of head and neck cancers [1–8]. Although vaccines are available that cover the most common cancer-causing genotypes, coverage is not complete among targeted age groups in the US [9], and there are oncogenic genotypes not covered by any of the available vaccines. In 2018, the US Preventive Services Task Force (USPSTF) updated its cervical cancer screening guidelines for women 21–65 to include an option of testing for high-risk HPV every five years, with or without cytology, in addition to the option of cervical cytology alone every three years [10]. While the USPSTF has concluded that the evidence for oral cancer screening in asymptomatic individuals is currently insufficient to recommend it, HPV testing could, in the future, be part of oral cancer screening either in the general population or in targeted, high-risk groups [2]. Because the most HPV infections clear without major consequences nor lead to cancer, it is essential that we understand the dynamics of cervicogenital and oral HPV infections, both to understand the implications of an oral HPV positive test and to understand the risk factors and transmission pathways associated with infection.

Cross-sectional studies, such as the National Health and Nutrition Examination Survey (NHANES) in the US, can identify risk factors associated with prevalence but are unable to assess those associated with infection dynamics—neither incidence nor clearance can be determined. Longitudinal studies of HPV, such as the HPV in Men (HIM) study [11], have provided estimates of site-specific incidence and clearance. However, most previous longitudinal studies have had a relatively long time period between follow-up, making it difficult to understand short-term infection and clearance dynamics.

The Michigan HPV and Oropharyngeal Cancer (MHOC) Study aims to evaluate patterns of oral HPV infection prevalence, incidence and clearance and their relationship to sexual history and sexual behaviors [12]. The epidemiological arm of the MHOC Study has tested a cohort of adults for oral and, in a substudy, cervicogenital HPV over 3 years, with follow-up visits every 3–4 months. This shorter follow-up time allows us to determine incidence and clearance rates in our participants with greater precision. Using a multistate transition model, we estimate the underlying rates of incidence and clearance for oral and cervicogenital HPV and the associations (hazard ratios) of demographic and behavioral characteristics on incidence at each site.

## Methods

We previously published the full MHOC study protocol [12]. We briefly describe the main aspects of the study here.

### Study subjects

Study participants were recruited in Ann Arbor, Michigan and the immediate surrounding areas. Participants were recruited at University of Michigan campus dormitories, through community fliers, and through the UM Health Research website. Volunteers over the age of 18 without a history of head and neck cancer who were willing to return every 3–4 months for 3 years for followup visits were invited to enroll. We enrolled 394 participants between April 2015 and December 2017. Participants completed between 1 and 12 visits, with a median of 6 visits; 325 participants completed at least 2 visits. A substudy focusing on cervicogenital HPV enrolled 130 participants. Documented informed consent was obtained from all participants. The University of Michigan IRB approved consent documents and study protocol (HUM00090236). Study data were collected and managed using REDCap electronic data capture tools hosted at the University of Michigan [13, 14].

### Surveys

A baseline questionnaire was administered to each participant at their initial visit. Participant ID numbers were assigned to ensure participant confidentiality. Follow-up surveys were administered at each subsequent visit. The surveys were designed to individually assess a variety of topics including demographics, vaccination and screening history, sexual health and behavior, and alcohol and drug use. Sexual behavior questions assessed current and past experiences of vaginal, oral, and anal sex. The baseline questionnaire collected a complete sexual behavior history, with the subsequent follow-up visits collecting more recent information and updates. Numbers of recent sexual partners were grouped into 0, 1, 2+ categories except for numbers of recent anal sex partners, which were grouped into 0 and 1+ because of smaller numbers.

### HPV testing

All participants self-collected a saliva sample with Scope mouthwash (Proctor & Gamble; Cincinnati, OH) or an Oragene RE-100 kit (DNA Genotek; Kanata, Canada). Saliva samples were taken at each study visit.

1  
2  
3 Participants who had a vagina, were not pregnant, and were not menstruating at the time of a study visit  
4 were invited to self-collect a cervicogenital sample with a HerSwab (Eve Medical; Toronto, Canada). The  
5 cervicogenital substudy was rolled out after the main study, so most substudy participants had their first  
6 cervicogenital test at a follow-up visit rather than at their baseline visit. DNA was extracted from samples  
7 and genotyped using PCR Mass Array [15]. We tested for genotypes 6, 11, 16, 18, 31, 33, 35, 39, 45, 51,  
8 52, 56, 58, 59, 66, 68, 73, and 90.  
9  
10  
11  
12

### 13 **Statistical analysis**

14  
15  
16  
17 We used Markov multistate transition modeling to estimate the incidence and clearance rate for oral HPV  
18 and cervicogenital HPV. Markov state transitions models are continuous-time, finite-state stochastic  
19 processes that assume that the transition hazard rate depends on one's current state but not on one's  
20 history (i.e., we assume that previous infection does not increase the likelihood of future infection) [16].  
21 Infection and clearance occur at any time, but we only observe individuals states at certain points in time  
22 (Figure 1). For a given rate of infection and clearance, we can calculate the probability of each individual's  
23 observed trajectory. By maximizing this probability as a function of the infection and clearance rates, we  
24 estimate best-fit rates. Data were analyzed in R 4.0 (R Foundation for Statistical Computing; Vienna,  
25 Austria) using the msm package [17], 2018–20. Participants with missing data were excluded from  
26 analyses involving those missing data. Participants lost to follow up were included if they had at least two  
27 visits.  
28  
29  
30  
31  
32  
33  
34  
35

36 For this analysis, we assumed that incidence and clearance of each HPV genotype occurs independently  
37 of the others and that hazard ratios are the same for all genotypes. We estimated hazard ratios for  
38 incidence for selected covariates in univariable models. We assumed there is no impact of covariates on  
39 clearance—both due to the lack of biological justification for the impact of most behavioral and  
40 demographic covariates on clearance and also due to potential issues of practical unidentifiability. That is,  
41 we want to avoid estimating increased incidence as reduced clearance if we are not observing at a  
42 sufficiently fine time scale. This will potentially neglect the impact of age on clearance, but we felt that  
43 the effect of age on incidence (e.g., via changes in risk, behavior, etc.) was more salient.  
44  
45  
46  
47  
48  
49  
50  
51  
52  
53  
54  
55  
56  
57  
58  
59  
60



## Patient and Public Involvement

Patients and the public were not involved in the design, or conduct, or reporting, or dissemination plans of our research.

## Results

Among the 325 participants who had at least two study visits, 317 had two or more valid oral HPV tests across any of their visits. The characteristics of these 317 participants are given in Table 1. An alluvial plot, which shows the number of participants in each state at each visit and the transition between statuses between subsequent visits, is shown in Figure 2a. Among these participants, we recorded 1,845 negative oral HPV tests and 148 positive oral HPV tests for at least one tested genotype. We observed 1,676 pairs of participant visits: 1,455 pairs of visits where the participant remained HPV negative, 94 pairs of visits where the participant transitioned from HPV negative to HPV positive, 107 pairs of visits where the participant transitioned from HPV positive to HPV negative, and 20 pairs of visits in which the participant remained positive for the same genotype. Only 16% of detected genotypes persisted to the next study visit. Through the multistate transition model, we estimated the average time to clearance of a previously detected genotype was 46 days (95% CI: 37–58 days).

Table 1: Baseline characteristics of participants in the MHOC Study with at least two study visits with valid HPV tests (data collected in Ann Arbor, MI, 2015-17, analyzed 2018-20). Note: percentages may not add up to 100% as participants could refuse to answer questions. \*Other than HPV.

|             | Full cohort (N=317) |     | Cervicogenital substudy cohort (N= 115) |     |
|-------------|---------------------|-----|-----------------------------------------|-----|
|             | %                   | n   | %                                       | n   |
| <b>Age</b>  |                     |     |                                         |     |
| 18          | 29%                 | 91  | 25%                                     | 29  |
| 19-22       | 33%                 | 104 | 32%                                     | 37  |
| 23-29       | 12%                 | 38  | 11%                                     | 13  |
| 30-49       | 12%                 | 37  | 16%                                     | 18  |
| 50+         | 15%                 | 47  | 16%                                     | 18  |
|             |                     |     |                                         |     |
| <b>Sex</b>  |                     |     |                                         |     |
| Female      | 68%                 | 216 | 100%                                    | 115 |
| Male        | 32%                 | 101 | 0%                                      | 0   |
|             |                     |     |                                         |     |
| <b>Race</b> |                     |     |                                         |     |

|                                                       |     |     |     |     |
|-------------------------------------------------------|-----|-----|-----|-----|
| White                                                 | 60% | 189 | 64% | 74  |
| Asian                                                 | 23% | 73  | 18% | 21  |
| Black/Hispanic/multiracial/unknown                    | 17% | 55  | 17% | 20  |
| <b>Marital/partner status</b>                         |     |     |     |     |
| Never married/partnered                               | 77% | 243 | 73% | 84  |
| Ever married/partnered                                | 23% | 72  | 27% | 31  |
| <b>Circumcised (male only)</b>                        |     |     |     |     |
| Yes                                                   | 68% | 69  | —   | —   |
| No                                                    | 31% | 31  | —   | —   |
| <b>Ever diagnosed with STI*</b>                       |     |     |     |     |
| No                                                    | 93% | 296 | 92% | 106 |
| Yes                                                   | 7%  | 21  | 8%  | 9   |
| <b>HPV vaccination</b>                                |     |     |     |     |
| No                                                    | 45% | 142 | 45% | 52  |
| Yes                                                   | 48% | 152 | 50% | 58  |
| <b>Alcohol use</b>                                    |     |     |     |     |
| Never or non-current                                  | 31% | 99  | 27% | 31  |
| Current                                               | 66% | 210 | 71% | 82  |
| <b>Ever cigarette use</b>                             |     |     |     |     |
| Never                                                 | 77% | 246 | 78% | 90  |
| Ever                                                  | 21% | 68  | 21% | 24  |
| <b>Ever marijuana use</b>                             |     |     |     |     |
| Never                                                 | 54% | 171 | 53% | 61  |
| Ever                                                  | 41% | 130 | 44% | 51  |
| <b>Deep kissing partners (6 months)</b>               |     |     |     |     |
| 0                                                     | 42% | 132 | 79% | 91  |
| 1                                                     | 34% | 109 | 14% | 16  |
| 2+                                                    | 24% | 76  | 7%  | 8   |
| <b>Vaginal, oral, or anal sex partners (6 months)</b> |     |     |     |     |
| 0                                                     | 39% | 124 | 35% | 40  |
| 1                                                     | 43% | 137 | 44% | 51  |
| 2+                                                    | 17% | 54  | 21% | 24  |
| <b>Vaginal sex partners (6 months)</b>                |     |     |     |     |
| 0                                                     | 49% | 154 | 43% | 50  |
| 1                                                     | 38% | 120 | 38% | 44  |

|                                               |     |     |     |     |
|-----------------------------------------------|-----|-----|-----|-----|
| 2+                                            | 13% | 41  | 18% | 21  |
|                                               |     |     |     |     |
| <b>Received oral sex partners (6 months)</b>  |     |     |     |     |
| 0                                             | 48% | 152 | 42% | 48  |
| 1                                             | 36% | 112 | 39% | 45  |
| 2+                                            | 16% | 51  | 19% | 22  |
|                                               |     |     |     |     |
| <b>Performed oral sex partners (6 months)</b> |     |     |     |     |
| 0                                             | 52% | 165 | 44% | 51  |
| 1                                             | 35% | 110 | 43% | 49  |
| 2+                                            | 13% | 40  | 13% | 15  |
|                                               |     |     |     |     |
| <b>Anal sex partners (6 months)</b>           |     |     |     |     |
| 0                                             | 89% | 279 | 89% | 101 |
| 1+                                            | 11% | 34  | 11% | 12  |

Among the 127 participants who provided cervicogenital samples for at least two study visits, 115 had two or more valid cervicogenital HPV tests; the characteristics of this subcohort mirror those of the full cohort, with the exception that the subcohort is entirely female. The characteristics of these 115 participants are given in Table 1, and alluvial plots of participant statuses are shown in Figure 2b. Among these participants, we recorded 396 negative oral HPV tests and 166 positive oral HPV tests for at least one tested genotype. We observed 447 pairs of participant visits: 250 pairs of visits where the participant remained HPV negative, 74 pairs of visits where the participant transitioned from HPV negative to HPV positive, 54 pairs of visits where the participant transitioned from HPV positive to HPV negative, and 69 pairs of visits in which the participant remained positive for the same genotype. Unlike oral infections, cervicogenital infections were persistent, with 56% of detected genotypes persisting to the next study visit. Using the multistate transition model, we estimated the average time to clearance of a previously detected genotype was 87 days (95% CI: 74–102 days).

Hazard ratios for HPV incidence are given in Tables 2. In this population, participants ages 23–29 and 50+ were less likely to acquire an oral HPV infection. There were no significant differences in incidence of cervicogenital HPV by age. Sex, race, marital status, circumcision status, previous sexually transmitted infection (STI) diagnosis, current alcohol use, and ever cigarette use were not associated with incidence of either oral or cervicogenital HPV. Ever marijuana use was associated with greater incidence of

cervicogenital HPV. Being vaccinated for HPV was significantly associated with lower incidence of cervicogenital HPV but not associated with incidence of oral HPV.

Table 2: Hazard ratios for the incidence rate of oral and cervicogenital HPV in the MHOC Study (data collected in Ann Arbor, MI, 2015-17, analyzed 2018-20). \*Other than HPV.

|                                    | Oral HPV incidence |              |              | Cervicogenital HPV incidence |              |              |
|------------------------------------|--------------------|--------------|--------------|------------------------------|--------------|--------------|
|                                    | N                  | Hazard ratio | 95% CI       | N                            | Hazard ratio | 95% CI       |
| <b>Age</b>                         |                    |              |              |                              |              |              |
| 18                                 | 91                 | 1 (ref)      | —            | 29                           | 1 (ref)      | —            |
| 19-22                              | 104                | 0.73         | (0.49, 1.1)  | 37                           | 1.18         | (0.82, 1.69) |
| 23-29                              | 38                 | <b>0.32</b>  | (0.15, 0.68) | 13                           | 1.03         | (0.63, 1.67) |
| 30-49                              | 37                 | 0.77         | (0.45, 1.29) | 18                           | 1.23         | (0.78, 1.94) |
| 50+                                | 47                 | <b>0.46</b>  | (0.27, 0.79) | 18                           | 0.92         | (0.59, 1.41) |
|                                    |                    |              |              |                              |              |              |
| <b>Sex</b>                         |                    |              |              |                              |              |              |
| Female                             | 216                | 1 (ref)      | —            | 115                          | 1 (ref)      | —            |
| Male                               | 101                | 0.85         | (0.59, 1.23) | 0                            | —            | —            |
|                                    |                    |              |              |                              |              |              |
| <b>Race</b>                        |                    |              |              |                              |              |              |
| White                              | 189                | 1 (ref)      | —            | 74                           | 1 (ref)      | —            |
| Asian                              | 73                 | 0.61         | (0.37, 1.02) | 21                           | 0.91         | (0.63, 1.32) |
| Black/Hispanic/multiracial/unknown | 55                 | 1.24         | (0.83, 1.85) | 20                           | 1.33         | (0.95, 1.87) |
|                                    |                    |              |              |                              |              |              |
| <b>Marital/partner status</b>      |                    |              |              |                              |              |              |
| Never married/partnered            | 243                | 1 (ref)      | —            | 84                           | 1 (ref)      | —            |
| Ever married/partnered             | 72                 | 0.80         | (0.54, 1.19) | 31                           | 0.82         | (0.59, 1.14) |
|                                    |                    |              |              |                              |              |              |
| <b>Circumcised (male only)</b>     |                    |              |              |                              |              |              |
| Yes                                |                    | 1 (ref)      | —            | —                            | —            | —            |
| No                                 |                    | 0.70         | (0.33, 1.47) | —                            | —            | —            |
|                                    |                    |              |              |                              |              |              |
| <b>Ever diagnosed with STI*</b>    |                    |              |              |                              |              |              |
| No                                 | 296                | 1 (ref)      | —            | 106                          | 1 (ref)      | —            |
| Yes                                | 21                 | 0.81         | (0.41, 1.59) | 9                            | 1.20         | (0.74, 1.92) |

|                                                       |     |             |              |    |             |              |
|-------------------------------------------------------|-----|-------------|--------------|----|-------------|--------------|
|                                                       |     |             |              |    |             |              |
| <b>HPV vaccination</b>                                |     |             |              |    |             |              |
| No                                                    | 142 | 1 (ref)     | —            | 52 | 1 (ref)     | —            |
| Yes                                                   | 152 | 1.22        | (0.87, 1.71) | 58 | <b>0.63</b> | (0.47, 0.83) |
|                                                       |     |             |              |    |             |              |
| <b>Alcohol use</b>                                    |     |             |              |    |             |              |
| Never or non-current                                  | 99  | 1 (ref)     | —            | 31 | 1 (ref)     | —            |
| Current                                               | 210 | 1.32        | (0.91, 1.94) | 82 | 1.11        | (0.82, 1.51) |
|                                                       |     |             |              |    |             |              |
| <b>Ever cigarette use</b>                             |     |             |              |    |             |              |
| Never                                                 | 246 | 1 (ref)     | —            | 90 | 1 (ref)     | —            |
| Ever                                                  | 68  | 1.37        | (0.71, 2.62) | 24 | 0.92        | (0.65, 1.29) |
|                                                       |     |             |              |    |             |              |
| <b>Ever marijuana use</b>                             |     |             |              |    |             |              |
| Never                                                 | 171 | 1 (ref)     | —            | 61 | 1 (ref)     | —            |
| Ever                                                  | 130 | 1.05        | (0.74, 1.47) | 51 | <b>1.48</b> | (1.12, 1.96) |
|                                                       |     |             |              |    |             |              |
| <b>Deep kissing partners (6 months)</b>               |     |             |              |    |             |              |
| 0                                                     | 132 | 1 (ref)     | —            |    | 1 (ref)     | —            |
| 1                                                     | 109 | 1.65        | (0.96, 2.83) |    | 0.87        | (0.49, 1.52) |
| 2+                                                    | 76  | <b>2.00</b> | (1.13, 3.56) |    | 0.57        | (0.25, 1.28) |
|                                                       |     |             |              |    |             |              |
| <b>Vaginal, oral, or anal sex partners (6 months)</b> |     |             |              |    |             |              |
| 0                                                     | 124 | 1 (ref)     | —            |    | 1 (ref)     | —            |
| 1                                                     | 137 | 1.26        | (0.87, 1.84) |    | <b>1.62</b> | (1.17, 2.26) |
| 2+                                                    | 54  | <b>1.70</b> | (1.08, 2.68) |    | <b>2.46</b> | (1.69, 3.59) |
|                                                       |     |             |              |    |             |              |
| <b>Vaginal sex partners (6 months)</b>                |     |             |              |    |             |              |
| 0                                                     | 154 | 1 (ref)     | —            |    | 1 (ref)     | —            |
| 1                                                     | 120 | 1.24        | (0.86, 1.78) |    | <b>1.44</b> | (1.05, 1.98) |
| 2+                                                    | 41  | <b>1.96</b> | (1.23, 3.11) |    | <b>3.35</b> | (2.34, 4.78) |
|                                                       |     |             |              |    |             |              |
| <b>Received oral sex partners (6 months)</b>          |     |             |              |    |             |              |
| 0                                                     | 152 | 1 (ref)     | —            |    | 1 (ref)     | —            |
| 1                                                     | 112 | 1.22        | (0.85, 1.74) |    | <b>1.60</b> | (1.18, 2.17) |
| 2+                                                    | 51  | 1.07        | (0.65, 1.76) |    | <b>1.81</b> | (1.24, 2.65) |
|                                                       |     |             |              |    |             |              |

|                                               |     |         |              |  |             |              |
|-----------------------------------------------|-----|---------|--------------|--|-------------|--------------|
| <b>Performed oral sex partners (6 months)</b> |     |         |              |  |             |              |
| 0                                             | 165 | 1 (ref) | —            |  | 1 (ref)     | —            |
| 1                                             | 110 | 1.41    | (1.00, 2.00) |  | <b>1.88</b> | (1.39, 2.53) |
| 2+                                            | 40  | 0.93    | (0.52, 1.69) |  | <b>1.97</b> | (1.31, 2.97) |
|                                               |     |         |              |  |             |              |
| <b>Anal sex partners (6 months)</b>           |     |         |              |  |             |              |
| 0                                             | 279 | 1 (ref) | —            |  | 1 (ref)     | —            |
| 1+                                            | 34  | 0.88    | (0.50, 1.56) |  | 1.33        | (0.89, 1.99) |

A greater number of deep kissing partners was associated with increased incidence of oral HPV but not significantly associated with cervicogenital HPV incidence. The number of recent (6 month) sexual partners (oral, vaginal, anal) and number of recent vaginal sex partners were each associated with greater incidence of both oral and cervicogenital HPV, with stronger associations for cervicogenital HPV. The number of recent sexual partners that one has received oral sex from or performed oral sex on were each associated with greater incidence of cervicogenital HPV but not associated with oral HPV incidence. Having at least one recent anal sex partner was not associated with either oral or cervicogenital HPV incidence.

## Discussion

In this study, we assessed the longitudinal dynamics of oral and cervicogenital HPV using frequent (every 3-4 months) testing over 3 years. We found that oral HPV was highly transient, with only 16% of detected genotypes persisting to the next study visit and an estimated mean of 46 days (about 1.5 months) to clearance. In contrast, cervicogenital HPV was more persistent, with 56% of detected genotypes persisting to the next study visit and an estimated mean of 87 days (about 3 months) to clearance. Incidence of oral and cervicogenital HPV were also associated with different behavioral patterns.

Previous studies estimating oral HPV clearance, including the HPV in Men (HIM) Study [18], the Finnish Family Study [19–21], and the Persistent Oral Human Papillomavirus Study [22], among others [23, 24], have varied substantially in their populations of interest, their sample collection and testing methodology, and their frequency of follow up [25, 26]. Estimates of time to clearance were substantially greater in the previous literature, on the order of 6 months or more, compared to the 1.5 months estimated here. Many previous studies of cervicogenital clearance, including the Hawaii Cohort Study [27] and others [28–33] have estimated mean or median clearance times of about 6-12 months, with some evidence of low-risk

1  
2  
3 types clearing more quickly. In our study, we did not have the statistical power to differentiate between  
4 low- and high-risk genotypes, but we estimated a mean clearance time of about 3 months.  
5  
6

7 Most previous studies had comparatively long periods between follow-up, potentially obscuring  
8 underlying dynamics, particularly if clearance is fast but reinfection from a reservoir (either self or partner)  
9 is common. Other work has suggested that there may be substantial variation in short-term detectability  
10 of HPV DNA that may impact results of our and previous studies [34]. If detectability varies, then more  
11 frequent sampling is more likely to record an apparent break in infection persistence. This phenomenon  
12 could contribute to the overall shorter times to oral or cervicogenital HPV clearance in this study compared  
13 to previous studies with longer times between follow-up. We are also specifically tracking genotypes  
14 individually and not whether an individual has an infection of any HPV type, which would increase  
15 estimates of persistence. Further study of the optimal sampling frequency and methodology for oral HPV  
16 measurements is needed—if oral infection dynamics are more rapid and variable, more frequent  
17 measurements may be needed to fully assess clearance and reinfection patterns. Finally, regarding the  
18 very low persistence of oral HPV in particular, it may be that the HPV DNA we are detecting in our  
19 participants' oral cavities do not reflect true basal layer infections, per se, but rather more superficial  
20 infections. Given that PCR testing is highly sensitive and detects DNA rather than viable virions, it may also  
21 be that some of these transient detections are from non-viable virus. However, the same detection  
22 methods were used for the oral and cervicogenital samples, and we do not see the same transience in the  
23 cervicogenital samples, which points to the results being driven by differences in the tissues or perhaps  
24 the collection methods.  
25  
26  
27  
28  
29  
30  
31  
32  
33  
34  
35  
36  
37  
38

39 In this analysis, HPV vaccination was associated with reduced incidence of cervicogenital HPV but not oral  
40 HPV. Previous work from us and others has indicated the HPV vaccination does reduce prevalence of oral  
41 HPV [35–37]. This result may give further credence to the hypothesis that we are detecting superficial  
42 infections. Cohort and age differences between our study sample and others could also explain the null  
43 effect found of vaccination on oral HPV infections.  
44  
45  
46  
47

48 Greater oral HPV incidence was associated with 2 or more recent deep kissing partners, vaginal sex  
49 partners, and any sex partners but was not associated with oral sex specifically. Previous literature has  
50 shown that oral HPV infection is most likely related to oral sex behaviors [22, 38, 39], so our lack of  
51 association may be due to confounding. Greater cervicogenital HPV incidence was not associated with  
52 recent deep kissing partners but was associated with 1 or 2 or more recent vaginal or oral sex partners.  
53  
54  
55  
56  
57  
58  
59  
60

1  
2  
3 The number of recent sexual partners has long been known as an important risk factor for HPV, which is  
4 sexually transmitted.  
5

6  
7 The strengths of this study include the longitudinal design with frequent follow up over 3 years as well as  
8 the multistate modeling approach to assessing incidence and clearance, which enables us to use a semi-  
9 mechanistic framework to estimate covariate effects. This approach is similar to one used to analyze  
10 recurring infections in the HIM study [40]. We also use a highly sensitive PCRbased technique for HPV  
11 detection [15]. The limitations of this study include the comparatively small sample size. We are also using  
12 self-reported vaccination and behavioral data, which are subject to misclassification.  
13  
14  
15  
16  
17

18 Our work contributes an additional perspective on the longitudinal dynamics of oral and cervicogenital  
19 HPV and finds substantial differences between the sites, which may have implications for the design and  
20 measurement frequency for future studies to track HPV infection and clearance dynamics. Furthermore,  
21 our infection and clearance estimates have direct application into the development of HPV transmission  
22 dynamics simulation models and of models of the natural history of HPV-related cancers [37, 41–44]. Last,  
23 because HPV-associated cancer risk is related to persistent HPV infections, cancer screening by HPV testing  
24 requires a clear understanding of the implications of a positive HPV test. Our work emphasizes that more  
25 work is needed to understand the natural history of oral HPV.  
26  
27  
28  
29  
30  
31  
32

### 33 **Author contributions**

34  
35

36 AFB: Formal analysis, methodology, software, writing – original draft, writing – review & editing. LPC: Data  
37 curation, investigation, project administration, supervision, writing – review & editing. HMW:  
38 Investigation, supervision, writing – review & editing. BMM: Investigation, project administration. CMG:  
39 Investigation. TBT: Investigation. RLD: Investigation, project administration. YKL: Investigation, project  
40 administration. ECA: Investigation, project administration. TN: Investigation. TEC: Conceptualization,  
41 funding acquisition, supervision, writing – review & editing. RM: Conceptualization, funding acquisition,  
42 supervision, writing – review & editing. MCE: Conceptualization, funding acquisition, supervision, writing  
43 – review & editing  
44  
45  
46  
47  
48  
49  
50  
51  
52  
53  
54  
55  
56  
57  
58  
59  
60



## Acknowledgments

We would like to thank the Michigan HPV and Oropharyngeal Cancer (M-HOC) study team for making this work possible, including Monica Yost, Jodi McCloskey, Taylor Sullivan, Alexander Mortensen, Suiyuan Huang, Keith Murphy, Bonnie Cheng, Kayla Stanek, Renata Terrazzan, Eliyas Asfaw, Mark Jung Woo Lee, Alexandra Kalabat, Ivan Montoya, Courtney Walsh, Ashley Wu, Liana Ysabel Bautista, Anna Morris, Nadine Jawad, Manila Hada, Bala Naveen Kakaraparthi, Peter Tortora, Taylor Vandenberg, Christina Hanson, Lucy Yang, Macy Afsari, Alanna Clark, Anna Gottschlich, Chinmay Pandit, Greg Foakes, Kristin Bevilacqua, Jesse Contreras, Maxwell Salvatore, Christian Alvarez, Pianpian Cao, Kelly Sun, Sheila Terrones, and Miranda West.

## Funding

This work was supported by National Institutes for Health grant U01CA182915. Data management was supported by the Michigan Institute for Clinical & Health Research (CTSA grant UL1TR002240).

## Data availability

The datasets generated and/or analyzed during the current study are not publicly available because of participant privacy concerns but are available from the corresponding author on reasonable request. IRB approval or a data use agreement may be required.

## Competing interests

The authors declare that they have no competing interests.

## Figure Legends

Figure 1: Participants transition between human papillomavirus (HPV) negative and positive states, and we observe these states at fixed time points. The multistate transition model estimates the underlying instantaneous infection and clearance rates that best explain the observed data when they are combined to estimate probabilities of being in each state at each visit.

1  
2  
3 Figure 2: Alluvial plots of the longitudinal a) oral and b) cervicogenital HPV status of participants in the  
4 Michigan HPV and Oropharyngeal Cancer (MHOC) Study (data collected in Ann Arbor, MI, 2015–17). Note  
5 that the cervicogenital testing was rolled out later than oral testing, so that the majority of “Invalid/not  
6 tested” participants in (b) represent individuals who participated in several study visits prior to the  
7 enrolling in the cervicogenital substudy.  
8  
9  
10  
11  
12  
13  
14

## 15 References

- 16  
17  
18 [1] Jemal A, Simard EP, Dorell C, Noone AM, Markowitz LE, Kohler B, et al. Annual Report to the Nation on the Status of Cancer,  
19 1975-2009, Featuring the Burden and Trends in Human Papillomavirus (HPV)-Associated Cancers and HPV Vaccination  
20 Coverage Levels. *Journal of the National Cancer Institute*. 2013;105(3):175–201.  
21  
22 [2] Gillison ML, Alemany L, Snijders PJF, Chaturvedi A, Steinberg BM, Schwartz S, et al. Human papillomavirus and diseases of  
23 the upper airway: head and neck cancer and respiratory papillomatosis. *Vaccine*. 2012;30 Suppl 5:F34–54.  
24  
25 [3] Serrano B, Brotons M, Bosch FX, Bruni L. Epidemiology and burden of HPV-related disease. *Best Practice & Research Clinical*  
26 *Obstetrics & Gynaecology*. 2018;47:14–26.  
27  
28 [4] de Martel C, Plummer M, Vignat J, Franceschi S. Worldwide burden of cancer attributable to HPV by site, country and HPV  
29 type. *International journal of cancer*. 2017;141(4):664–670.  
30  
31 [5] Chaturvedi AK, Engels EA, Anderson WF, Gillison ML. Incidence trends for human papillomavirus-related and -unrelated  
32 oral squamous cell carcinomas in the United States. *Journal of Clinical Oncology*. 2008;26(4):612–9.  
33  
34 [6] Chaturvedi AK, Engels EA, Pfeiffer RM, Hernandez BY, Xiao W, Kim E, et al. Human papillomavirus and rising oropharyngeal  
35 cancer incidence in the United States. *Journal of Clinical Oncology*. 2011;29(32):4294–301.  
36  
37 [7] Chaturvedi AK, Anderson WF, Lortet-Tieulent J, Paula Curado M, Ferlay J, Franceschi S, et al. Worldwide trends in incidence  
38 rates for oral cavity and oropharyngeal cancers. *Journal of Clinical Oncology*. 2013;31(36):4550–4559.  
39  
40 [8] Chaturvedi AK, D’Souza G, Gillison ML, Katki HA. Burden of HPV-positive oropharynx cancers among ever and never smokers  
41 in the U.S. population. *Oral Oncology*. 2016;60:61–67.  
42  
43 [9] Elam-Evans LD, Yankey D, Singleton JA, Sterrett N, Markowitz LE, Williams CL, et al. National, regional, state, and selected  
44 local area vaccination coverage among adolescents aged 13–17 years United States, 2019. *Morbidity and Mortality Weekly*  
45 *Report*. 2020;69(33):1109.  
46  
47  
48  
49  
50  
51  
52  
53  
54  
55  
56  
57  
58  
59  
60

- 1  
2  
3 [10] Curry SJ, Krist AH, Owens DK, Barry MJ, Caughey AB, Davidson KW, et al. Screening for Cervical Cancer. *JAMA*.  
4 2018;320(7):674.  
5  
6  
7 [11] Giuliano AR, Lazcano-Ponce E, Villa LL, Flores R, Salmeron J, Lee JH, et al. The human papillomavirus infection in men study:  
8 human papillomavirus prevalence and type distribution among men residing in Brazil, Mexico, and the United States.  
9 *Cancer Epidemiology, Biomarkers & Prevention*. 2008;17(8):2036–43.  
10  
11  
12 [12] Eisenberg MC, Campredon LP, Brouwer AF, Walline HM, Marinelli BM, Lau YK, et al. Dynamics and Determinants of HPV  
13 Infection: The Michigan HPV and Oropharyngeal Cancer (M-HOC) Study. *BMJ Open*. 2018;8(10):e021618.  
14  
15  
16 [13] Harris PA, Taylor R, Thielke R, Payne J, Gonzalez N, Conde JG. Research electronic data capture (REDCap) a metadata-driven  
17 methodology and workflow process for providing translational research informatics support. *Journal of Biomedical*  
18 *Informatics*. 2009;42(2):377–381.  
19  
20  
21 [14] Harris PA, Taylor R, Minor BL, Elliott V, Fernandez M, O’Neal L, et al. The REDCap consortium: Building an international  
22 community of software platform partners. *Journal of Biomedical Informatics*. 2019;95:103208.  
23  
24  
25 [15] Walline HM, Komarck C, McHugh JB, Byrd SA, Spector ME, Hauff SJ, et al. High-risk human papillomavirus detection in  
26 oropharyngeal, nasopharyngeal, and oral cavity cancers comparison of multiple methods. *JAMA Otolaryngology - Head and*  
27 *Neck Surgery*. 2013;139(12):1320–7.  
28  
29  
30 [16] Durrett R. *Essentials of Stochastic Processes*. Springer; 1999.  
31  
32  
33 [17] Jackson CH. Multi-State Models for Panel Data: The msm Package for R. *Journal of Statistical Software*. 2011;38(8):1–29.  
34 Available from: <http://www.jstatsoft.org/v38/i08/>.  
35  
36  
37 [18] Kreimer AR, Campbell CMP, Lin HY, Fulp W, Papenfuss MR, Abrahamsen M, et al. Incidence and clearance of oral human  
38 papillomavirus infection in men: the HIM cohort study. *The Lancet*. 2013;382(9895):877–887.  
39  
40  
41 [19] Kero K, Rautava J, Syrjanen K, Willberg J, Grenman S, Syrjänen S. Smoking increases oral HPV persistence among men: 7-  
42 year follow-up study. *European Journal of Clinical Microbiology & Infectious Diseases*. 2014;33(1):123–33.  
43  
44  
45 [20] Louvanto K, Rautava J, Willberg J, Wideman L, Syrjanen K, Grenman S, et al. Genotype-specific incidence and clearance  
46 of human papillomavirus in oral mucosa of women: a six-year follow-up study. *PLoS One*. 2013;8(1):e53413.  
47  
48  
49 [21] Rautava J, Willberg J, Louvanto K, Wideman L, Syrjanen K, Grenman S, et al. Prevalence, Genotype Distribution and  
50 Persistence of Human Papillomavirus in Oral Mucosa of Women: A Six-Year Follow-Up Study. *PLOS ONE*. 2012;7(8):42171–  
51 42177.  
52  
53  
54 [22] Beachler DC, Sugar EA, Margolick JB, Weber KM, Strickler HD, Wiley DJ, et al. Risk factors for acquisition and clearance of  
55 oral human papillomavirus infection among HIV-infected and HIV-uninfected adults. *American Journal of Epidemiology*.  
56 2015;181(1):40–53.  
57  
58  
59  
60

- 1  
2  
3 [23] Edelstein ZR, Schwartz SM, Hawes S, Hughes JP, Feng Q, Stern ME, et al. Rates and determinants of oral human  
4 papillomavirus infection in young men. *Sexually Transmitted Diseases*. 2012;39(11):860–7.  
5  
6  
7 [24] The prevalence and incidence of oral human papillomavirus infection among young men and women, aged 18-30 years.  
8 *Sexually Transmitted Diseases*. 2012;39(7):559–66.  
9  
10 [25] Wood ZC, Bain CJ, Smith DD, Whiteman DC, Antonsson A. Oral human papillomavirus infection incidence and clearance: a  
11 systematic review of the literature. *Journal of General Virology*. 2017;98(4):519–526.  
12  
13  
14 [26] Taylor S, Bunge E, Bakker M, Castellsague X. The incidence, clearance and persistence of non-cervical human papillomavirus  
15 infections: a systematic review of the literature. *BMC infectious diseases*. 2016;16:293.  
16  
17  
18 [27] Goodman MT, Shvetsov YB, McDuffie K, Wilkens LR, Zhu X, Thompson PJ, et al. Prevalence, acquisition, and clearance of  
19 cervical human papillomavirus infection among women with normal cytology: Hawaii human papillomavirus cohort study.  
20 *Cancer Research*. 2008;68(21):8813–8824.  
21  
22  
23 [28] Moscicki AB, Shiboski S, Broering J, Powell K, Clayton L, Jay N, et al. The natural history of human papillomavirus infection  
24 as measured by repeated DNA testing in adolescent and young women. *The Journal of Pediatrics*. 1998;132(2):277–84.  
25  
26  
27 [29] Franco ELL, Villa LLL, Sobrinho JPP, Prado JMM, Rousseau MC, D'esy M, et al. Epidemiology of acquisition and clearance of  
28 cervical human papillomavirus infection in women from a high-risk area for cervical cancer. *Journal of Infectious Diseases*.  
29 1999;180(5):1415–23.  
30  
31  
32 [30] Molano M, Van den Brule A, Plummer M, Weiderpass E, Posso H, Arslan A, et al. Determinants of clearance of human  
33 papillomavirus infections in Colombian women with normal cytology: a population-based, 5-year follow-up study. *American*  
34 *Journal of Epidemiology*. 2003;158(5):486–94.  
35  
36  
37 [31] Munoz N, Mendez F, Posso H, Molano M, van den Brule AJC, Ronderos M, et al. Incidence, duration, and determinants  
38 of cervical human papillomavirus infection in a cohort of Colombian women with normal cytological results. *The Journal of*  
39 *Infectious Diseases*. 2004;190(12):2077–87.  
40  
41  
42 [32] Moscicki AB, Ma Y, Farhat S, Jay J, Hanson E, Benningfield S, et al. Natural History of Anal Human Papillomavirus Infection  
43 in Heterosexual Women and Risks Associated With Persistence. *Clinical Infectious Diseases*. 2014 mar;58(6):804–811.  
44  
45  
46 [33] El-Zein M, Ramanakumar AV, Naud P, Roteli-Martins CM, de Carvalho NS, Colares de Borba P, et al. Determinants of  
47 Acquisition and Clearance of Human Papillomavirus Infection in Previously Unexposed Young Women. *Sexually Transmitted*  
48 *Diseases*. 2019;46(10):663–669.  
49  
50  
51 [34] Liu SH, Cummings DaT, Zenilman JM, Gravitt PE, Brotman RM. Characterizing the temporal dynamics of human  
52 papillomavirus DNA detectability using short-interval sampling. *Cancer Epidemiology Biomarkers and Prevention*.  
53 2014;23(1):200–208.  
54  
55  
56  
57  
58  
59  
60

- 1  
2  
3 [35] Chaturvedi AK, Graubard BI, Broutian T, Xiao W, Pickard RKL, Kahle L, et al. Prevalence of Oral HPV Infection in Unvaccinated  
4 Men and Women in the United States, 2009-2016. *JAMA*. 2019;322(10):977.  
5  
6  
7 [36] Hirth JM, Chang M, Resto VA, Guo F, Berenson AB. Prevalence of oral human papillomavirus by vaccination status among  
8 young adults (18–30 years old). *Vaccine*. 2017;35(27):3446–3451.  
9  
10 [37] Brouwer AF, Eisenberg MC, Carey TE, Meza R. Multisite HPV infections in the United States (NHANES 20032014): An  
11 overview and synthesis. *Preventive Medicine*. 2019;123:288–298.  
12  
13  
14 [38] Beachler DC, Weber KM, Margolick JB, Strickler HD, Cranston RD, Burk RD, et al. Risk Factors for Oral HPV Infection among  
15 a High Prevalence Population of HIV-Positive and At-Risk HIV-Negative Adults. *Cancer Epidemiology Biomarkers &*  
16 *Prevention*. 2012;21(1):122–133.  
17  
18 [39] D’Souza G, Cullen K, Bowie J, Thorpe R, Fakhry C. Differences in oral sexual behaviors by gender, age, and race explain  
19 observed differences in prevalence of oral human papillomavirus infection. *PLOS One*. 2014;9(1):e86023.  
20  
21  
22 [40] Ranjeva SL, Baskerville EB, Dukic V, Villa LL, Lazcano-Ponce E, Giuliano AR, et al. Recurring infection with ecologically distinct  
23 HPV types can explain high prevalence and diversity. *Proceedings of the National Academy of Sciences*.  
24 2017;114(51):13573–13578.  
25  
26  
27 [41] Brouwer AF, Meza R, Eisenberg MC. Transmission heterogeneity and autoinoculation in a multisite infection model of HPV.  
28 *Mathematical Biosciences*. 2015;270:115–125.  
29  
30  
31 [42] Brouwer AF, Eisenberg MC, Meza R. Case Studies of Gastric, Lung, and Oral Cancer Connect Etiologic Agent Prevalence to  
32 Cancer Incidence. *Cancer Research*. 2018;78(12):3386–3397.  
33  
34  
35 [43] Hall MT, Simms KT, Lew JB, Smith MA, Brotherton JM, Saville M, et al. The projected timeframe until cervical cancer  
36 elimination in Australia: a modelling study. *The Lancet Public Health*. 2018;2667(18):1–9.  
37  
38  
39 [44] Ryser MD, Gravitt PE, Myers ER. Mechanistic mathematical models: An underused platform for HPV research.  
40 *Papillomavirus Research*. 2017;3:46–49.  
41  
42  
43  
44  
45  
46  
47  
48  
49  
50  
51  
52  
53  
54  
55  
56  
57  
58  
59  
60

**Reality:** underlying continuous-time transition history

**Data:** observed states at specific times

**Model:** transition hazard rates

Infection states

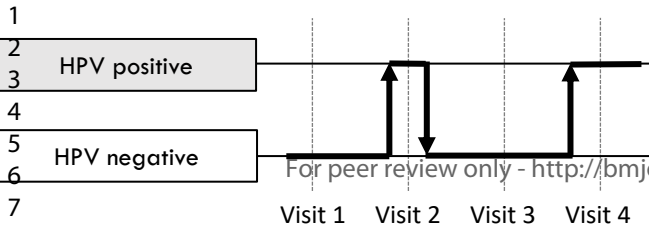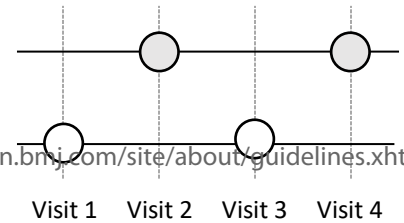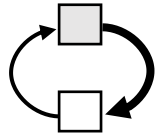

For peer review only - <http://bmjopen.bmj.com/site/about/guidelines.xhtml>

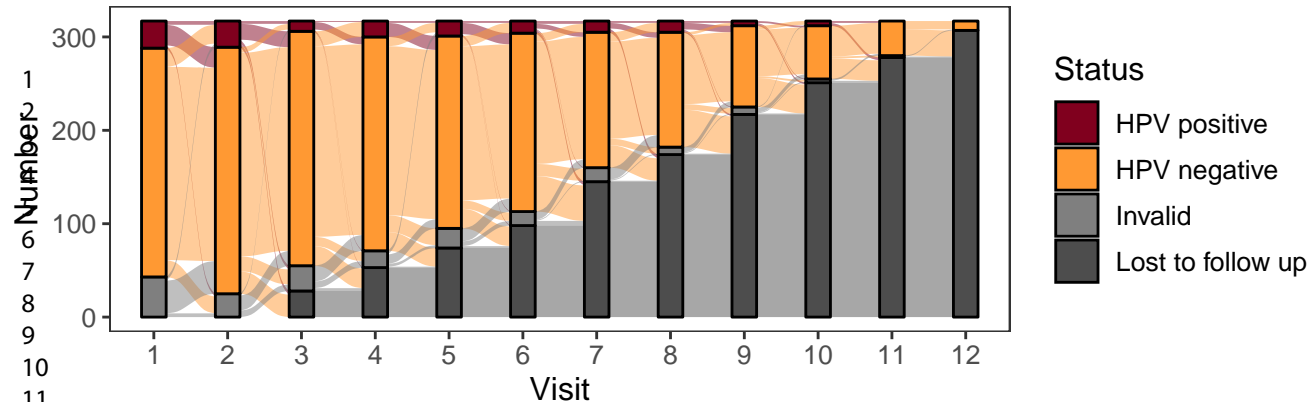

b Cervicogenital HPV

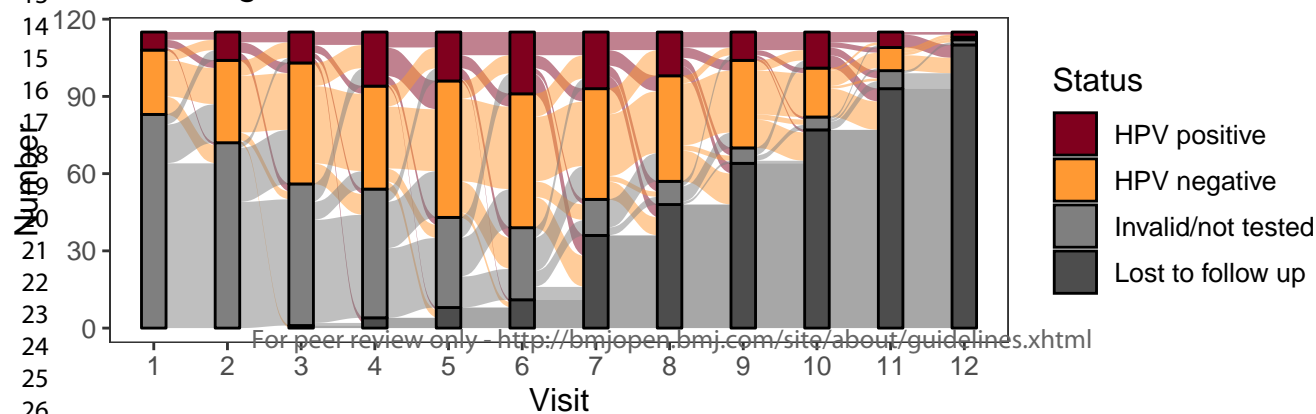

STROBE Statement—Checklist of items that should be included in reports of *cohort studies*

|                           | Item No | Recommendation                                                                                                                                                                                    | Reported on page #     |
|---------------------------|---------|---------------------------------------------------------------------------------------------------------------------------------------------------------------------------------------------------|------------------------|
| <b>Title and abstract</b> | 1       | (a) Indicate the study's design with a commonly used term in the title or the abstract                                                                                                            | 1                      |
|                           |         | (b) Provide in the abstract an informative and balanced summary of what was done and what was found                                                                                               | 2                      |
| <b>Introduction</b>       |         |                                                                                                                                                                                                   |                        |
| Background/rationale      | 2       | Explain the scientific background and rationale for the investigation being reported                                                                                                              | 3                      |
| Objectives                | 3       | State specific objectives, including any prespecified hypotheses                                                                                                                                  | 3                      |
| <b>Methods</b>            |         |                                                                                                                                                                                                   |                        |
| Study design              | 4       | Present key elements of study design early in the paper                                                                                                                                           | 4 (also given in [12]) |
| Setting                   | 5       | Describe the setting, locations, and relevant dates, including periods of recruitment, exposure, follow-up, and data collection                                                                   | 4 (also given in [12]) |
| Participants              | 6       | (a) Give the eligibility criteria, and the sources and methods of selection of participants. Describe methods of follow-up                                                                        | 4 (also given in [12]) |
|                           |         | (b) For matched studies, give matching criteria and number of exposed and unexposed                                                                                                               | NA                     |
| Variables                 | 7       | Clearly define all outcomes, exposures, predictors, potential confounders, and effect modifiers. Give diagnostic criteria, if applicable                                                          | 5                      |
| Data sources/measurement  | 8*      | For each variable of interest, give sources of data and details of methods of assessment (measurement). Describe comparability of assessment methods if there is more than one group              | 5                      |
| Bias                      | 9       | Describe any efforts to address potential sources of bias                                                                                                                                         | 5                      |
| Study size                | 10      | Explain how the study size was arrived at                                                                                                                                                         | Given in [12]          |
| Quantitative variables    | 11      | Explain how quantitative variables were handled in the analyses. If applicable, describe which groupings were chosen and why                                                                      | 4                      |
| Statistical methods       | 12      | (a) Describe all statistical methods, including those used to control for confounding                                                                                                             | 5                      |
|                           |         | (b) Describe any methods used to examine subgroups and interactions                                                                                                                               | NA                     |
|                           |         | (c) Explain how missing data were addressed                                                                                                                                                       | 5                      |
|                           |         | (d) If applicable, explain how loss to follow-up was addressed                                                                                                                                    | 5                      |
|                           |         | (e) Describe any sensitivity analyses                                                                                                                                                             | NA                     |
| <b>Results</b>            |         |                                                                                                                                                                                                   |                        |
| Participants              | 13*     | (a) Report numbers of individuals at each stage of study—eg numbers potentially eligible, examined for eligibility, confirmed eligible, included in the study, completing follow-up, and analysed | 6                      |
|                           |         | (b) Give reasons for non-participation at each stage                                                                                                                                              | NA                     |
|                           |         | (c) Consider use of a flow diagram                                                                                                                                                                | Given in [12]          |
| Descriptive data          | 14*     | (a) Give characteristics of study participants (eg demographic, clinical, social) and information on exposures and potential confounders                                                          | 6-8                    |
|                           |         | (b) Indicate number of participants with missing data for each variable of                                                                                                                        | Table 1                |



|                          |     |                                                                                                                                                                                                              |             |
|--------------------------|-----|--------------------------------------------------------------------------------------------------------------------------------------------------------------------------------------------------------------|-------------|
|                          |     | interest                                                                                                                                                                                                     |             |
|                          |     | (c) Summarise follow-up time (eg, average and total amount)                                                                                                                                                  | 4, 6        |
| Outcome data             | 15* | Report numbers of outcome events or summary measures over time                                                                                                                                               | 6, 8        |
| Main results             | 16  | (a) Give unadjusted estimates and, if applicable, confounder-adjusted estimates and their precision (eg, 95% confidence interval). Make clear which confounders were adjusted for and why they were included | Table 2     |
|                          |     | (b) Report category boundaries when continuous variables were categorized                                                                                                                                    | Table 1 & 2 |
|                          |     | (c) If relevant, consider translating estimates of relative risk into absolute risk for a meaningful time period                                                                                             | NA          |
| Other analyses           | 17  | Report other analyses done—eg analyses of subgroups and interactions, and sensitivity analyses                                                                                                               | NA          |
| <b>Discussion</b>        |     |                                                                                                                                                                                                              |             |
| Key results              | 18  | Summarise key results with reference to study objectives                                                                                                                                                     | 11          |
| Limitations              | 19  | Discuss limitations of the study, taking into account sources of potential bias or imprecision. Discuss both direction and magnitude of any potential bias                                                   | 13          |
| Interpretation           | 20  | Give a cautious overall interpretation of results considering objectives, limitations, multiplicity of analyses, results from similar studies, and other relevant evidence                                   | 11-12       |
| Generalisability         | 21  | Discuss the generalisability (external validity) of the study results                                                                                                                                        | 11-12       |
| <b>Other information</b> |     |                                                                                                                                                                                                              |             |
| Funding                  | 22  | Give the source of funding and the role of the funders for the present study and, if applicable, for the original study on which the present article is based                                                | 13          |

\*Give information separately for exposed and unexposed groups.

**Note:** An Explanation and Elaboration article discusses each checklist item and gives methodological background and published examples of transparent reporting. The STROBE checklist is best used in conjunction with this article (freely available on the Web sites of PLoS Medicine at <http://www.plosmedicine.org/>, Annals of Internal Medicine at <http://www.annals.org/>, and Epidemiology at <http://www.epidem.com/>). Information on the STROBE Initiative is available at <http://www.strobe-statement.org>.

# BMJ Open

## Incidence and clearance of oral and cervicogenital HPV infection: longitudinal analysis of the MHOC cohort study

|                                 |                                                                                                                                                                                                                                                                                                                                                                                                                                                                                                                                                                                                                                                                                                                                                                                                                  |
|---------------------------------|------------------------------------------------------------------------------------------------------------------------------------------------------------------------------------------------------------------------------------------------------------------------------------------------------------------------------------------------------------------------------------------------------------------------------------------------------------------------------------------------------------------------------------------------------------------------------------------------------------------------------------------------------------------------------------------------------------------------------------------------------------------------------------------------------------------|
| Journal:                        | <i>BMJ Open</i>                                                                                                                                                                                                                                                                                                                                                                                                                                                                                                                                                                                                                                                                                                                                                                                                  |
| Manuscript ID                   | bmjopen-2021-056502.R1                                                                                                                                                                                                                                                                                                                                                                                                                                                                                                                                                                                                                                                                                                                                                                                           |
| Article Type:                   | Original research                                                                                                                                                                                                                                                                                                                                                                                                                                                                                                                                                                                                                                                                                                                                                                                                |
| Date Submitted by the Author:   | 29-Nov-2021                                                                                                                                                                                                                                                                                                                                                                                                                                                                                                                                                                                                                                                                                                                                                                                                      |
| Complete List of Authors:       | Brouwer, Andrew; University of Michigan, Department of Epidemiology<br>Campredon, Lora; University of Michigan, Epidemiology<br>Walline, Heather; University of Michigan, Otolaryngology<br>Marinelli, Brittany; University of Michigan, Department of Otolaryngology<br>Goudsmit, Christine; University of Michigan, Otolaryngology<br>Thomas, Trey; University of Michigan, Otolaryngology<br>Delinger, Rachel; University of Michigan, Epidemiology<br>Lau, Yan; University of Michigan, Epidemiology<br>Andrus, Emily; University of Michigan, Department of Epidemiology<br>Nair, Thankam; University of Michigan, Otolaryngology<br>Carey, Thomas; University of Michigan, Otolaryngology<br>Eisenberg, Marisa; University of Michigan, Epidemiology<br>Meza, Rafael; University of Michigan, Epidemiology |
| <b>Primary Subject Heading</b>: | Epidemiology                                                                                                                                                                                                                                                                                                                                                                                                                                                                                                                                                                                                                                                                                                                                                                                                     |
| Secondary Subject Heading:      | Dentistry and oral medicine, Obstetrics and gynaecology, Infectious diseases, Sexual health                                                                                                                                                                                                                                                                                                                                                                                                                                                                                                                                                                                                                                                                                                                      |
| Keywords:                       | EPIDEMIOLOGY, GYNAECOLOGY, Epidemiology < INFECTIOUS DISEASES, OTOLARYNGOLOGY, PUBLIC HEALTH, SEXUAL MEDICINE                                                                                                                                                                                                                                                                                                                                                                                                                                                                                                                                                                                                                                                                                                    |
|                                 |                                                                                                                                                                                                                                                                                                                                                                                                                                                                                                                                                                                                                                                                                                                                                                                                                  |

SCHOLARONE™  
Manuscripts

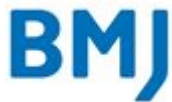

I, the Submitting Author has the right to grant and does grant on behalf of all authors of the Work (as defined in the below author licence), an exclusive licence and/or a non-exclusive licence for contributions from authors who are: i) UK Crown employees; ii) where BMJ has agreed a CC-BY licence shall apply, and/or iii) in accordance with the terms applicable for US Federal Government officers or employees acting as part of their official duties; on a worldwide, perpetual, irrevocable, royalty-free basis to BMJ Publishing Group Ltd ("BMJ") its licensees and where the relevant Journal is co-owned by BMJ to the co-owners of the Journal, to publish the Work in this journal and any other BMJ products and to exploit all rights, as set out in our [licence](#).

The Submitting Author accepts and understands that any supply made under these terms is made by BMJ to the Submitting Author unless you are acting as an employee on behalf of your employer or a postgraduate student of an affiliated institution which is paying any applicable article publishing charge ("APC") for Open Access articles. Where the Submitting Author wishes to make the Work available on an Open Access basis (and intends to pay the relevant APC), the terms of reuse of such Open Access shall be governed by a Creative Commons licence – details of these licences and which [Creative Commons](#) licence will apply to this Work are set out in our licence referred to above.

Other than as permitted in any relevant BMJ Author's Self Archiving Policies, I confirm this Work has not been accepted for publication elsewhere, is not being considered for publication elsewhere and does not duplicate material already published. I confirm all authors consent to publication of this Work and authorise the granting of this licence.

1  
2  
3 **Incidence and clearance of oral and cervicogenital HPV infection: longitudinal analysis of the MHOC**  
4 **cohort study**  
5

6  
7 **Authors:** Andrew F. Brouwer<sup>a</sup>, Lora P. Campredon<sup>a</sup>, Heather M. Walline<sup>b</sup>, Brittany M. Marinelli<sup>b</sup>,  
8  
9  
10 Christine M. Goudsmit<sup>b</sup>, Trey B. Thomas<sup>a,b</sup>, Rachel L. Delinger<sup>a</sup>, Yan Kwan Lau<sup>a</sup>, Emily C. Andrus<sup>a</sup>,  
11  
12  
13 Thankam Nair<sup>b</sup>, Thomas E. Carey<sup>b</sup>, Marisa C. Eisenberg<sup>a,†</sup>, Rafael Meza<sup>a,†</sup>  
14

15  
16 †: These authors contributed equally.  
17

18 *a*: Department of Epidemiology, University of Michigan, Ann Arbor, Michigan  
19

20  
21 *b*: Department of Otolaryngology, University of Michigan, Ann Arbor, Michigan  
22

23  
24 \*: corresponding author, brouweaf@umich.edu, 1415 Washington Heights, Department of Epidemiology,  
25  
26 Ann Arbor, MI 48109  
27

28 Word count: 2,710  
29

30  
31 **Keywords:** human papillomavirus, oral, cervicogenital, longitudinal, multistate transition model, sexual  
32  
33 behavior  
34  
35  
36  
37  
38  
39  
40  
41  
42  
43  
44  
45  
46  
47  
48  
49  
50  
51  
52  
53  
54  
55  
56  
57  
58  
59  
60

## Abstract

**Objectives:** The Michigan HPV and Oropharyngeal Cancer (MHOC) Study aimed to evaluate patterns of oral and cervicogenital HPV infection prevalence, incidence, and clearance as well as their relationship to sexual behaviors.

**Design:** Cohort

**Setting:** General public in and around Ann Arbor, MI

**Participants:** 394 college-age and older-adult participants of both sexes provided oral samples, and 325 completed at least 2 visits. 130 who provided a cervicogenital samples, and 127 completed at least 2 visits.

**Outcomes:** Incidence and clearance rates as well as hazard ratios (HR) for oral and cervicogenital HPV.

**Results:** Oral HPV infections were transient, with only 16% of genotypes persisting to the next visit. The mean time to clearance of a genotype was 46 days (95% CI: 37–58). In contrast, cervicogenital infections were more persistent, with 56% of genotypes persisting to the next visit. The mean time to clearance of a genotype was 87 days (95% CI: 74–102). HPV vaccination was associated with reduced incidence of cervicogenital HPV infection (HR: 0.63; 95% CI: 0.47, 0.83) but not oral HPV infection. Incidence of oral HPV infection was associated with 2+ recent deep kissing partners (HR: 2.00; 95% CI: 1.13, 3.56). Incidence of both oral (HR: 1.70; 95% CI: 1.08, 2.68) and cervicogenital (HR: 2.46; 95% CI 1.69, 3.59) was associated with 2+ recent sexual partners.

**Conclusions:** Detection of oral HPV was highly transient, but incidence was associated with recent deep kissing and sexual partners. Detection of cervicogenital HPV was more persistent, and incidence was positively associated with recent sexual partners and negatively associated with HPV vaccination.

## Article summary

### Strengths and limitations of this study

- This study enrolled men and women and reports on both oral and cervicogenital HPV
- This study's longitudinal cohort design allowed for inference of HPV dynamics
- This study is limited by its comparatively small sample size and convenience sample design.

## Introduction

The human papillomavirus (HPV) is the cause of virtually every cervical cancer and an increasing number and fraction of head and neck cancers [1–8]. Although vaccines are available that cover the most common cancer-causing genotypes, coverage is not complete among targeted age groups in the US [9], and there are oncogenic genotypes not covered by any of the available vaccines. In 2018, the US Preventive Services Task Force (USPSTF) updated its cervical cancer screening guidelines for women 21–65 to include an option of testing for high-risk HPV every five years, with or without cytology, in addition to the option of cervical cytology alone every three years [10]. While the USPSTF has concluded that the evidence for oral cancer screening in asymptomatic individuals is currently insufficient to recommend it, HPV testing could, in the future, be part of oral cancer screening either in the general population or in targeted, high-risk groups [2]. Because the most HPV infections clear without major consequences nor lead to cancer, it is essential that we understand the dynamics of cervicogenital and oral HPV infections, both to understand the implications of an oral HPV positive test and to understand the risk factors and transmission pathways associated with infection.

Cross-sectional studies, such as the National Health and Nutrition Examination Survey (NHANES) in the US, can identify risk factors associated with prevalence but are unable to assess those associated with infection dynamics—neither incidence nor clearance can be determined. Longitudinal studies of HPV, such as the HPV in Men (HIM) study [11], have provided estimates of site-specific incidence and clearance. However, most previous longitudinal studies have had a relatively long time period between follow-up, making it difficult to understand short-term infection and clearance dynamics.

The Michigan HPV and Oropharyngeal Cancer (MHOC) Study aims to evaluate patterns of oral HPV infection prevalence, incidence and clearance and their relationship to sexual history and sexual behaviors [12]. The epidemiological arm of the MHOC Study has tested a cohort of adults for oral and, in a substudy, cervicogenital HPV over 3 years, with follow-up visits every 3–4 months. Our analysis of baseline oral and cervicogenital HPV prevalence may be found elsewhere [13]. This shorter follow-up time allows us to determine incidence and clearance rates in our participants with greater precision. Using a multistate transition model, we estimate the underlying rates of incidence and clearance for oral and cervicogenital HPV and the associations (hazard ratios) of demographic and behavioral characteristics on incidence at each site.

## Methods

We previously published the full MHOC study protocol [12]. We briefly describe the main aspects of the study here.

### Study subjects

Study participants were recruited in Ann Arbor, Michigan and the immediate surrounding areas. Participants were recruited at University of Michigan campus dormitories, through community fliers, and through the UM Health Research website. Volunteers over the age of 18 without a history of head and neck cancer who were willing to return every 3–4 months for 3 years for follow-up visits were invited to enroll. We enrolled 394 participants between April 2015 and December 2017. Participants completed between 1 and 12 visits, with a median of 6 visits; 325 participants completed at least 2 visits. A substudy focusing on cervicogenital HPV enrolled 130 participants. Documented informed consent was obtained from all participants. The University of Michigan IRB approved consent documents and study protocol (HUM00090236). Study data were collected and managed using REDCap electronic data capture tools hosted at the University of Michigan [14, 15].

### Surveys

A baseline questionnaire was administered to each participant at their initial visit. Participant ID numbers were assigned to ensure participant confidentiality. Follow-up surveys were administered at each subsequent visit. The surveys were designed to individually assess a variety of topics including demographics, STI and preventive screening history, sexual health and behavior, alcohol and drug use, and vaccination status. Vaccination status was self-reported, and due to missingness in the number of vaccine doses variable, we classified any participant reporting at least one dose of an HPV vaccine as vaccinated. Given the time frame and geographic location of the study, most vaccinated participants would have received Gardasil (6, 11, 16, 18). Sexual behavior questions assessed current and past experiences of vaginal, oral, and anal sex. The baseline questionnaire collected a complete sexual behavior history, with the subsequent follow-up visits collecting more recent information and updates. Numbers of recent sexual partners were grouped into 0, 1, 2+ categories except for numbers of recent anal sex partners, which were grouped into 0 and 1+ because of smaller numbers.

## HPV testing

All participants self-collected a saliva sample with Scope mouthwash (Proctor & Gamble; Cincinnati, OH) or an Oragene RE-100 kit (DNA Genotek; Kanata, Canada). Saliva samples were taken at each study visit. Participants who had a vagina, were not pregnant, and were not menstruating at the time of a study visit were invited to self-collect a cervicogenital sample with a HerSwab (Eve Medical; Toronto, Canada). The cervicogenital substudy was rolled out after the main study, so most substudy participants had their first cervicogenital test at a follow-up visit rather than at their baseline visit. DNA was extracted from samples and genotyped using PCR Mass Array; technical details of sample processing are given in our protocol paper [12], and technical details of the PCR Mass Array test are given in [16]. We tested for genotypes 6, 11, 16, 18, 31, 33, 35, 39, 45, 51, 52, 56, 58, 59, 66, 68, 73, and 90. Participants whose samples contained insufficient DNA or otherwise resulted in inconclusive test results were denoted as invalid.

## Statistical analysis

We used Markov multistate transition modeling to estimate the incidence and clearance rate for oral HPV and cervicogenital HPV. Markov state transitions models are continuous-time, finite-state stochastic processes that assume that the transition hazard rate depends on one's current state but not on one's history (i.e., we assume that previous infection does not increase the likelihood of future infection) [17]. Infection and clearance occur at any time, but we only observe individuals states at certain points in time (Figure 1). For a given rate of infection and clearance, we can calculate the probability of each individual's observed trajectory. By maximizing this probability as a function of the infection and clearance rates, we estimate best-fit rates. Data were analyzed in R 4.0 (R Foundation for Statistical Computing; Vienna, Austria) using the msm package [18], 2018–20. Participants with missing data were excluded from analyses involving those missing data. Participants lost to follow up were included if they had at least two visits.

For this analysis, we assumed that incidence and clearance of each HPV genotype occurs independently of the others and that hazard ratios are the same for all genotypes. We estimated genotype-specific rates only if there were at least 25 detections and more than one observation of persistence. We estimated hazard ratios for incidence for selected covariates in univariable models. For these models, we assumed there is no impact of covariates on clearance—both due to the lack of biological justification for the impact of most behavioral and demographic covariates on clearance and also due to potential issues of practical



1  
2  
3 unidentifiability. That is, we want to avoid estimating increased incidence as reduced clearance if we are  
4 not observing at a sufficiently fine time scale. This will potentially neglect the impact of age on clearance,  
5 but we felt that the effect of age on incidence (e.g., via changes in risk, behavior, etc.) was more salient.  
6 We also separately tested the association of the detection of multiple HPV types with clearance in a model  
7 with fixed incidence.  
8  
9  
10

## 11 12 **Patient and Public Involvement**

13  
14  
15 Patients and the public were not involved in the design, or conduct, or reporting, or dissemination plans  
16 of our research.  
17  
18  
19

## 20 **Results**

21  
22  
23 Among the 325 participants who had at least two study visits, 317 had two or more valid oral HPV tests  
24 across any of their visits. The characteristics of these 317 participants are given in Table 1. Oral HPV  
25 prevalence among first valid tests was 11% (34). An alluvial plot, which shows the number of participants  
26 in each state at each visit and the transition between statuses between subsequent visits, is shown in  
27 Figure 2a. Among the participants, we recorded 1,845 negative oral HPV tests and 148 positive oral HPV  
28 tests for at least one tested genotype. We observed 1,676 pairs of participant visits: 1,455 pairs of visits  
29 where the participant remained HPV negative, 94 pairs of visits where the participant transitioned from  
30 HPV negative to HPV positive, 107 pairs of visits where the participant transitioned from HPV positive to  
31 HPV negative, and 20 pairs of visits in which the participant remained positive for the same genotype.  
32 (Note: the numbers of transitions will not add up to the number of tests because each participant  
33 contributes one fewer transition than their number of tests, and so the correspondence between  
34 transitions and tests depends on the specific distribution of number of tests each participant has). Only  
35 16% of detected genotypes persisted to the next study visit. Through the multistate transition model, we  
36 estimated the average time to clearance of a previously detected genotype was 46 days (95% CI: 37–58  
37 days). No single genotype was detected as being persistent in an oral test more than once; accordingly,  
38 we did not estimate genotype-specific time-to-clearance for any genotypes. Time to clear one genotype  
39 was not significantly different if the participant had multiple genotypes detected (HR: 1.25, 95% CI: 0.65,  
40 2.24). Only 8 individuals had multiple distinct detections of the same genotype, (i.e., two positive tests  
41 with at least one negative test in between).  
42  
43  
44  
45  
46  
47  
48  
49  
50  
51  
52  
53  
54  
55  
56  
57  
58  
59  
60

Table 1: Baseline characteristics of participants in the MHOC Study with at least two study visits with valid HPV tests (data collected in Ann Arbor, MI, 2015-17, analyzed 2018-20). Note: percentages may not add up to 100% as participants could refuse to answer questions. \*Other than HPV.

|                                    | Full cohort (N=317) |     | Cervicogenital substudy cohort (N= 115) |     |
|------------------------------------|---------------------|-----|-----------------------------------------|-----|
|                                    | %                   | n   | %                                       | n   |
| <b>Age</b>                         |                     |     |                                         |     |
| 18                                 | 29%                 | 91  | 25%                                     | 29  |
| 19-22                              | 33%                 | 104 | 32%                                     | 37  |
| 23-29                              | 12%                 | 38  | 11%                                     | 13  |
| 30-49                              | 12%                 | 37  | 16%                                     | 18  |
| 50+                                | 15%                 | 47  | 16%                                     | 18  |
|                                    |                     |     |                                         |     |
| <b>Sex</b>                         |                     |     |                                         |     |
| Female                             | 68%                 | 216 | 100%                                    | 115 |
| Male                               | 32%                 | 101 | 0%                                      | 0   |
|                                    |                     |     |                                         |     |
| <b>Race</b>                        |                     |     |                                         |     |
| White                              | 60%                 | 189 | 64%                                     | 74  |
| Asian                              | 23%                 | 73  | 18%                                     | 21  |
| Black/Hispanic/multiracial/unknown | 17%                 | 55  | 17%                                     | 20  |
|                                    |                     |     |                                         |     |
| <b>Marital/partner status</b>      |                     |     |                                         |     |
| Never married/partnered            | 77%                 | 243 | 73%                                     | 84  |
| Ever married/partnered             | 23%                 | 72  | 27%                                     | 31  |
|                                    |                     |     |                                         |     |
| <b>Circumcised (male only)</b>     |                     |     |                                         |     |
| Yes                                | 68%                 | 69  | —                                       | —   |
| No                                 | 31%                 | 31  | —                                       | —   |
|                                    |                     |     |                                         |     |
| <b>Ever diagnosed with STI*</b>    |                     |     |                                         |     |
| No                                 | 93%                 | 296 | 92%                                     | 106 |
| Yes                                | 7%                  | 21  | 8%                                      | 9   |
|                                    |                     |     |                                         |     |
| <b>HPV vaccination</b>             |                     |     |                                         |     |
| No                                 | 45%                 | 142 | 45%                                     | 52  |
| Yes                                | 48%                 | 152 | 50%                                     | 58  |
|                                    |                     |     |                                         |     |
| <b>Alcohol use</b>                 |                     |     |                                         |     |
| Never or non-current               | 31%                 | 99  | 27%                                     | 31  |
| Current                            | 66%                 | 210 | 71%                                     | 82  |
|                                    |                     |     |                                         |     |
| <b>Ever cigarette use</b>          |                     |     |                                         |     |
| Never                              | 77%                 | 246 | 78%                                     | 90  |
| Ever                               | 21%                 | 68  | 21%                                     | 24  |
|                                    |                     |     |                                         |     |
| <b>Ever marijuana use</b>          |                     |     |                                         |     |
| Never                              | 54%                 | 171 | 53%                                     | 61  |

|                                                       |     |     |     |     |
|-------------------------------------------------------|-----|-----|-----|-----|
| Ever                                                  | 41% | 130 | 44% | 51  |
|                                                       |     |     |     |     |
| <b>Sexual attraction</b>                              |     |     |     |     |
| Only to another gender                                | 72% | 229 | 73% | 84  |
| Mostly to another gender                              | 15% | 46  | 20% | 23  |
| Equal or mostly/only to same gender                   | 10% | 33  | 3%  | 4   |
|                                                       |     |     |     |     |
| <b>Deep kissing partners (6 months)</b>               |     |     |     |     |
| 0                                                     | 42% | 132 | 79% | 91  |
| 1                                                     | 34% | 109 | 14% | 16  |
| 2+                                                    | 24% | 76  | 7%  | 8   |
|                                                       |     |     |     |     |
| <b>Vaginal, oral, or anal sex partners (6 months)</b> |     |     |     |     |
| 0                                                     | 39% | 124 | 35% | 40  |
| 1                                                     | 43% | 137 | 44% | 51  |
| 2+                                                    | 17% | 54  | 21% | 24  |
|                                                       |     |     |     |     |
| <b>Vaginal sex partners (6 months)</b>                |     |     |     |     |
| 0                                                     | 49% | 154 | 43% | 50  |
| 1                                                     | 38% | 120 | 38% | 44  |
| 2+                                                    | 13% | 41  | 18% | 21  |
|                                                       |     |     |     |     |
| <b>Received oral sex partners (6 months)</b>          |     |     |     |     |
| 0                                                     | 48% | 152 | 42% | 48  |
| 1                                                     | 36% | 112 | 39% | 45  |
| 2+                                                    | 16% | 51  | 19% | 22  |
|                                                       |     |     |     |     |
| <b>Performed oral sex partners (6 months)</b>         |     |     |     |     |
| 0                                                     | 52% | 165 | 44% | 51  |
| 1                                                     | 35% | 110 | 43% | 49  |
| 2+                                                    | 13% | 40  | 13% | 15  |
|                                                       |     |     |     |     |
| <b>Anal sex partners (6 months)</b>                   |     |     |     |     |
| 0                                                     | 89% | 279 | 89% | 101 |
| 1+                                                    | 11% | 34  | 11% | 12  |

Among the 127 participants who provided cervicogenital samples for at least two study visits, 115 had two or more valid cervicogenital HPV tests; the characteristics of this subcohort mirror those of the full cohort, with the exception that the subcohort is entirely female. Cervicogenital HPV prevalence among first valid tests was 20% (23). The characteristics of these 115 participants are given in Table 1, and alluvial plots of participant statuses are shown in Figure 2b. Among these participants, we recorded 396 negative cervicogenital HPV tests and 166 positive cervicogenital HPV tests for at least one tested genotype. We observed 447 pairs of participant visits: 250 pairs of visits where the participant remained HPV negative, 74 pairs of visits where the participant transitioned from HPV negative to HPV positive, 54 pairs of visits

1  
2  
3 where the participant transitioned from HPV positive to HPV negative, and 69 pairs of visits in which the  
4 participant remained positive for the same genotype. Unlike oral infections, cervicogenital infections were  
5 persistent, with 56% of detected genotypes persisting to the next study visit. Using the multistate  
6 transition model, we estimated the average time to clearance of a previously detected genotype was 87  
7 days (95% CI: 74–102 days). We estimated genotype-specific time-to-clearance for HPV59 (85 days, 95%  
8 CI: 54–135), HPV66 (76 days; 95% CI: 56–102), and HPV90 (70 days; 95% CI: 47–104), which were all  
9 comparable. Time to clear one genotype was not significantly different if the participant had multiple  
10 genotypes detected (HR: 0.79, 95% CI: 0.33, 1.91). Twenty-one individuals had multiple distinct detections  
11 of the same genotype.  
12  
13  
14  
15  
16  
17  
18

19 Hazard ratios for HPV incidence are given in Table 2. In this population, participants ages 23–29 and 50+  
20 were less likely to acquire an oral HPV infection. There were no significant differences in incidence of  
21 cervicogenital HPV by age. Sex, race, marital status, circumcision status, previous sexually transmitted  
22 infection (STI) diagnosis, current alcohol use, and ever cigarette use were not associated with incidence  
23 of either oral or cervicogenital HPV. Ever marijuana use was associated with greater incidence of  
24 cervicogenital HPV. Being vaccinated for HPV was significantly associated with lower incidence of  
25 cervicogenital HPV but not associated with incidence of oral HPV.  
26  
27  
28  
29  
30  
31

32 A greater number of deep kissing partners was associated with increased incidence of oral HPV but not  
33 significantly associated with cervicogenital HPV incidence. The number of recent (6 month) sexual  
34 partners (oral, vaginal, anal) and number of recent vaginal sex partners were each associated with greater  
35 incidence of both oral and cervicogenital HPV, with stronger associations for cervicogenital HPV. The  
36 number of recent sexual partners that one has received oral sex from or performed oral sex on were each  
37 associated with greater incidence of cervicogenital HPV but not associated with oral HPV incidence. Having  
38 at least one recent anal sex partner was not associated with either oral or cervicogenital HPV incidence.  
39  
40  
41  
42  
43  
44  
45  
46  
47  
48  
49  
50  
51  
52  
53  
54  
55  
56  
57  
58  
59  
60

Table 2: Hazard ratios for the incidence rate of oral and cervicogenital HPV in the MHOC Study (data collected in Ann Arbor, MI, 2015-17, analyzed 2018-20). \*Other than HPV. †Cells with fewer than 5 participants are censored.

|                                    | Oral HPV incidence |              |              | Cervicogenital HPV incidence |              |              |
|------------------------------------|--------------------|--------------|--------------|------------------------------|--------------|--------------|
|                                    | n                  | Hazard ratio | 95% CI       | n                            | Hazard ratio | 95% CI       |
| <b>Age</b>                         |                    |              |              |                              |              |              |
| 18                                 | 91                 | 1 (ref)      | —            | 29                           | 1 (ref)      | —            |
| 19-22                              | 104                | 0.73         | (0.49, 1.1)  | 37                           | 1.18         | (0.82, 1.69) |
| 23-29                              | 38                 | <b>0.32</b>  | (0.15, 0.68) | 13                           | 1.03         | (0.63, 1.67) |
| 30-49                              | 37                 | 0.77         | (0.45, 1.29) | 18                           | 1.23         | (0.78, 1.94) |
| 50+                                | 47                 | <b>0.46</b>  | (0.27, 0.79) | 18                           | 0.92         | (0.59, 1.41) |
| <b>Sex</b>                         |                    |              |              |                              |              |              |
| Female                             | 216                | 1 (ref)      | —            | 115                          | 1 (ref)      | —            |
| Male                               | 101                | 0.85         | (0.59, 1.23) | 0                            | —            | —            |
| <b>Race</b>                        |                    |              |              |                              |              |              |
| White                              | 189                | 1 (ref)      | —            | 74                           | 1 (ref)      | —            |
| Asian                              | 73                 | 0.61         | (0.37, 1.02) | 21                           | 0.91         | (0.63, 1.32) |
| Black/Hispanic/multiracial/unknown | 55                 | 1.24         | (0.83, 1.85) | 20                           | 1.33         | (0.95, 1.87) |
| <b>Marital/partner status</b>      |                    |              |              |                              |              |              |
| Never married/partnered            | 243                | 1 (ref)      | —            | 84                           | 1 (ref)      | —            |
| Ever married/partnered             | 72                 | 0.80         | (0.54, 1.19) | 31                           | 0.82         | (0.59, 1.14) |
| <b>Circumcised (male only)</b>     |                    |              |              |                              |              |              |
| Yes                                |                    | 1 (ref)      | —            | —                            | —            | —            |
| No                                 |                    | 0.70         | (0.33, 1.47) | —                            | —            | —            |
| <b>Ever diagnosed with STI*</b>    |                    |              |              |                              |              |              |
| No                                 | 296                | 1 (ref)      | —            | 106                          | 1 (ref)      | —            |
| Yes                                | 21                 | 0.81         | (0.41, 1.59) | 9                            | 1.20         | (0.74, 1.92) |
| <b>HPV vaccination</b>             |                    |              |              |                              |              |              |
| No                                 | 142                | 1 (ref)      | —            | 52                           | 1 (ref)      | —            |
| Yes                                | 152                | 1.22         | (0.87, 1.71) | 58                           | <b>0.63</b>  | (0.47, 0.83) |
| <b>Alcohol use</b>                 |                    |              |              |                              |              |              |
| Never or non-current               | 99                 | 1 (ref)      | —            | 31                           | 1 (ref)      | —            |
| Current                            | 210                | 1.32         | (0.91, 1.94) | 82                           | 1.11         | (0.82, 1.51) |

|                                                       |     |             |              |    |             |              |
|-------------------------------------------------------|-----|-------------|--------------|----|-------------|--------------|
| <b>Ever cigarette use</b>                             |     |             |              |    |             |              |
| Never                                                 | 246 | 1 (ref)     | —            | 90 | 1 (ref)     | —            |
| Ever                                                  | 68  | 1.37        | (0.71, 2.62) | 24 | 0.92        | (0.65, 1.29) |
| <b>Ever marijuana use</b>                             |     |             |              |    |             |              |
| Never                                                 | 171 | 1 (ref)     | —            | 61 | 1 (ref)     | —            |
| Ever                                                  | 130 | 1.05        | (0.74, 1.47) | 51 | <b>1.48</b> | (1.12, 1.96) |
| <b>Sexual attraction</b>                              |     |             |              |    |             |              |
| Only to another gender                                | 229 | 1 (ref)     |              | 84 | 1 (ref)     |              |
| Mostly to another gender                              | 46  | <b>1.57</b> | (1.02, 2.43) | 23 | <b>1.53</b> | (1.09, 2.17) |
| Equal or mostly/only to same gender                   | 33  | 0.92        | (0.50, 1.68) | 4  | †           | †            |
| <b>Deep kissing partners (6 months)</b>               |     |             |              |    |             |              |
| 0                                                     | 132 | 1 (ref)     | —            |    | 1 (ref)     | —            |
| 1                                                     | 109 | 1.65        | (0.96, 2.83) |    | 0.87        | (0.49, 1.52) |
| 2+                                                    | 76  | <b>2.00</b> | (1.13, 3.56) |    | 0.57        | (0.25, 1.28) |
| <b>Vaginal, oral, or anal sex partners (6 months)</b> |     |             |              |    |             |              |
| 0                                                     | 124 | 1 (ref)     | —            |    | 1 (ref)     | —            |
| 1                                                     | 137 | 1.26        | (0.87, 1.84) |    | <b>1.62</b> | (1.17, 2.26) |
| 2+                                                    | 54  | <b>1.70</b> | (1.08, 2.68) |    | <b>2.46</b> | (1.69, 3.59) |
| <b>Vaginal sex partners (6 months)</b>                |     |             |              |    |             |              |
| 0                                                     | 154 | 1 (ref)     | —            |    | 1 (ref)     | —            |
| 1                                                     | 120 | 1.24        | (0.86, 1.78) |    | <b>1.44</b> | (1.05, 1.98) |
| 2+                                                    | 41  | <b>1.96</b> | (1.23, 3.11) |    | <b>3.35</b> | (2.34, 4.78) |
| <b>Received oral sex partners (6 months)</b>          |     |             |              |    |             |              |
| 0                                                     | 152 | 1 (ref)     | —            |    | 1 (ref)     | —            |
| 1                                                     | 112 | 1.22        | (0.85, 1.74) |    | <b>1.60</b> | (1.18, 2.17) |
| 2+                                                    | 51  | 1.07        | (0.65, 1.76) |    | <b>1.81</b> | (1.24, 2.65) |
| <b>Performed oral sex partners (6 months)</b>         |     |             |              |    |             |              |
| 0                                                     | 165 | 1 (ref)     | —            |    | 1 (ref)     | —            |
| 1                                                     | 110 | 1.41        | (1.00, 2.00) |    | <b>1.88</b> | (1.39, 2.53) |
| 2+                                                    | 40  | 0.93        | (0.52, 1.69) |    | <b>1.97</b> | (1.31, 2.97) |
| <b>Anal sex partners (6 months)</b>                   |     |             |              |    |             |              |
| 0                                                     | 279 | 1 (ref)     | —            |    | 1 (ref)     | —            |
| 1+                                                    | 34  | 0.88        | (0.50, 1.56) |    | 1.33        | (0.89, 1.99) |

## Discussion

In this study, we assessed the longitudinal dynamics of oral and cervicogenital HPV using frequent (every 3-4 months) testing over 3 years. We found that oral HPV was highly transient, with only 16% of detected genotypes persisting to the next study visit and an estimated mean of 46 days (about 1.5 months) to clearance. In contrast, cervicogenital HPV was more persistent, with 56% of detected genotypes persisting to the next study visit and an estimated mean of 87 days (about 3 months) to clearance. Incidence of oral and cervicogenital HPV were also associated with different behavioral patterns.

Previous studies estimating oral HPV clearance, including the HPV in Men (HIM) Study [19], the Finnish Family Study [20–22], and the Persistent Oral Human Papillomavirus Study [23], among others [24, 25], have varied substantially in their populations of interest, their sample collection and testing methodology, and their frequency of follow up [26, 27]. Estimates of time to clearance were substantially greater in the previous literature, on the order of 6 months or more, compared to the 1.5 months estimated here. Many previous studies of cervicogenital clearance, including the Hawaii Cohort Study [28] and others [29–34] have estimated mean or median clearance times of about 6–12 months, with some evidence of low-risk types clearing more quickly. In our study, we did not have the statistical power to differentiate between low- and high-risk genotypes, but we estimated a mean clearance time of about 3 months.

Most previous studies had comparatively long periods between follow-up, potentially obscuring underlying dynamics, particularly if clearance is fast but reinfection from a reservoir (either self or partner) is common. Other work has suggested that there may be substantial variation in short-term detectability of HPV DNA that may impact results of our and previous studies [35]. If detectability varies, then more frequent sampling is more likely to record an apparent break in infection persistence. This phenomenon could contribute to the overall shorter times to oral or cervicogenital HPV clearance in this study compared to previous studies with longer times between follow up. We are also specifically tracking genotypes individually and not whether an individual has an infection of any HPV type, which would increase estimates of persistence. Further study of the optimal sampling frequency and methodology for oral HPV measurements is needed—if oral infection dynamics are more rapid and variable, more frequent measurements may be needed to fully assess clearance and reinfection patterns. Finally, regarding the very low persistence of oral HPV in particular, it may be that the HPV DNA we are detecting in our participants' oral cavities do not reflect true basal layer infections but rather more superficial infections. Given that PCR testing is highly sensitive and detects DNA rather than viable virions, it may also be that

1  
2  
3 some of these transient detections are from non-viable virus. However, the same detection methods were  
4 used for the oral and cervicogenital samples, and we do not see the same transience in the cervicogenital  
5 samples, which points to the results being driven by differences in the tissues or perhaps the collection  
6 methods.  
7  
8  
9

10  
11 In this analysis, HPV vaccination was associated with reduced incidence of cervicogenital HPV but not oral  
12 HPV. Previous, cross-sectional work has indicated the HPV vaccination does reduce prevalence of oral HPV  
13 [36–38]. Our longitudinal results, then, may give further credence to the hypothesis that we are detecting  
14 superficial oral infections. However, because oral HPV infections were relatively rare, we may have not  
15 had the power to detect an impact of vaccination. Cohort and age differences between our study sample  
16 and others might also explain the lack of detected association. Also, if most of the observed genotypes  
17 were not covered by the participants' vaccines (and cross-protection is likely minimal), then this result  
18 might be expected. However, of the 193 distinct detections of genotypes in oral tests, more than half (109)  
19 were type 6, 11, 16, or 18 (Table S1). In comparison, about one-fifth (36) of the 166 distinct cervicogenital  
20 detections were type 6, 11, 16, or 18. These results may suggest that vaccination had a greater impact on  
21 cervicogenital infection than on oral infection in this cohort.  
22  
23  
24  
25  
26  
27  
28

29  
30 Greater oral HPV incidence was associated with 2 or more recent deep kissing partners, vaginal sex  
31 partners, and any sex partners but was not associated with oral sex specifically. Previous literature has  
32 shown that oral HPV infection is most likely related to oral sex behaviors [23, 39, 40], so our lack of  
33 association may be due to confounding. Indeed, the association between oral sex behavior and oral HPV  
34 infection was shown to be confounded by age-cohort and race in a previous study [40]. Greater  
35 cervicogenital HPV incidence was not associated with recent deep kissing partners but was associated with  
36 1 or 2 or more recent vaginal or oral sex partners. The number of recent sexual partners has long been  
37 known as an important risk factor for HPV, which is sexually transmitted. Ever marijuana use, which was  
38 associated with increased incidence of cervicogenital HPV infection, may not be a direct risk factor but  
39 instead be associated with true underlying risk factors that are difficult to measure directly. Although there  
40 is some laboratory evidence of immune modulation by cannabinoids [41], epidemiological evidence for  
41 an association between marijuana use and cervicogenital HPV has been mixed [42-45], suggesting that it  
42 is indeed likely confounded with other behaviors. Incidence of both oral and cervicogenital HPV was  
43 greater in participants who indicated sexual attraction mostly but not only to another gender; this type of  
44 “heteroflexible” orientation has been previously associated with higher-risk sexual behavior and STIs [46].  
45  
46  
47  
48  
49  
50  
51  
52  
53  
54  
55  
56  
57  
58  
59  
60



1  
2  
3 There was no indication of increased incidence for participants expressing sexual attraction to multiple  
4 genders equally or mostly or only to the same gender.  
5  
6

7  
8 The strengths of this study include the longitudinal design with frequent follow up over 3 years as well as  
9 the multistate modeling approach to assessing incidence and clearance, which enables us to use a semi-  
10 mechanistic framework to estimate covariate effects. This approach is similar to one used to analyze  
11 recurring infections in the HIM study [47]. We also use a highly sensitive PCR-based technique for HPV  
12 detection [16]. The limitations of this study include the comparatively small sample size. We are also using  
13 self-reported vaccination and behavioral data, which are subject to misclassification.  
14  
15  
16  
17

18  
19 Our work contributes an additional perspective on the longitudinal dynamics of oral and cervicogenital  
20 HPV and finds substantial differences between the sites, which may have implications for the design and  
21 measurement frequency for future studies to track HPV infection and clearance dynamics. Furthermore,  
22 our infection and clearance estimates have direct application into the development of HPV transmission  
23 dynamics simulation models and of models of the natural history of HPV-related cancers [38, 48–51].  
24 Lastly, because HPV-associated cancer risk is related to persistent HPV infections, cancer screening by HPV  
25 testing requires a clear understanding of the implications of a positive HPV test. Our work emphasizes that  
26 more work is needed to understand the natural history of oral HPV.  
27  
28  
29  
30  
31  
32

### 33 **Author contributions**

34  
35

36 AFB: Formal analysis, methodology, software, writing – original draft, writing – review & editing. LPC: Data  
37 curation, investigation, project administration, supervision, writing – review & editing. HMW:  
38 Investigation, supervision, writing – review & editing. BMM: Investigation, project administration. CMG:  
39 Investigation. TBT: Investigation. RLD: Investigation, project administration. YKL: Investigation, project  
40 administration. ECA: Investigation, project administration. TN: Investigation. TEC: Conceptualization,  
41 funding acquisition, supervision, writing – review & editing. RM: Conceptualization, funding acquisition,  
42 supervision, writing – review & editing. MCE: Conceptualization, funding acquisition, supervision, writing  
43 – review & editing  
44  
45  
46  
47  
48  
49  
50  
51  
52  
53  
54  
55  
56  
57  
58  
59  
60

## Acknowledgments

We would like to thank the Michigan HPV and Oropharyngeal Cancer (M-HOC) study team for making this work possible, including Monica Yost, Jodi McCloskey, Taylor Sullivan, Alexander Mortensen, Suiyuan Huang, Keith Murphy, Bonnie Cheng, Kayla Stanek, Renata Terrazzan, Eliyas Asfaw, Mark Jung Woo Lee, Alexandra Kalabat, Ivan Montoya, Courtney Walsh, Ashley Wu, Liana Ysabel Bautista, Anna Morris, Nadine Jawad, Manila Hada, Bala Naveen Kakaraparthi, Peter Tortora, Taylor Vandenberg, Christina Hanson, Lucy Yang, Macy Afsari, Alanna Clark, Anna Gottschlich, Chinmay Pandit, Greg Foakes, Kristin Bevilacqua, Jesse Contreras, Maxwell Salvatore, Christian Alvarez, Pianpian Cao, Kelly Sun, Sheila Terrones, and Miranda West.

## Funding

This work was supported by National Institutes for Health grant U01CA182915. Data management was supported by the Michigan Institute for Clinical & Health Research (CTSA grant UL1TR002240).

## Data availability

The datasets generated and/or analyzed during the current study are not publicly available because of participant privacy concerns but are available from the corresponding author on reasonable request. IRB approval or a data use agreement may be required.

## Competing interests

The authors declare that they have no competing interests.

## Figure Legends

Figure 1: Participants transition between human papillomavirus (HPV) negative and positive states, and we observe these states at fixed time points. The multistate transition model estimates the underlying instantaneous infection and clearance rates that best explain the observed data when they are combined to estimate probabilities of being in each state at each visit.

1  
2  
3 Figure 2: Alluvial plots of the longitudinal a) oral and b) cervicogenital HPV status of participants in the  
4 Michigan HPV and Oropharyngeal Cancer (MHOC) Study (data collected in Ann Arbor, MI, 2015–17). Note  
5 that the cervicogenital testing was rolled out later than oral testing, so that the majority of “Invalid/not  
6 tested” participants in (b) represent individuals who participated in several study visits prior to the  
7 enrolling in the cervicogenital substudy.  
8  
9  
10

## 11 12 13 Ethical Approval Statement

14  
15  
16 This study was approved by the University of Michigan IRB (HUM00090236).  
17

## 18 19 20 21 22 23 24 25 26 27 28 29 30 31 32 33 34 35 36 37 38 39 40 41 42 43 44 45 46 47 48 49 50 51 52 53 54 55 56 57 58 59 60 References

- [1] Jemal A, Simard EP, Dorell C, Noone AM, Markowitz LE, Kohler B, et al. Annual Report to the Nation on the Status of Cancer, 1975–2009, Featuring the Burden and Trends in Human Papillomavirus (HPV)-Associated Cancers and HPV Vaccination Coverage Levels. *Journal of the National Cancer Institute*. 2013;105(3):175–201.
- [2] Gillison ML, Alemany L, Snijders PJF, Chaturvedi A, Steinberg BM, Schwartz S, et al. Human papillomavirus and diseases of the upper airway: head and neck cancer and respiratory papillomatosis. *Vaccine*. 2012;30 Suppl 5:F34–54.
- [3] Serrano B, Brotons M, Bosch FX, Bruni L. Epidemiology and burden of HPV-related disease. *Best Practice & Research Clinical Obstetrics & Gynaecology*. 2018;47:14–26.
- [4] de Martel C, Plummer M, Vignat J, Franceschi S. Worldwide burden of cancer attributable to HPV by site, country and HPV type. *International journal of cancer*. 2017;141(4):664–670.
- [5] Chaturvedi AK, Engels EA, Anderson WF, Gillison ML. Incidence trends for human papillomavirus-related and -unrelated oral squamous cell carcinomas in the United States. *Journal of Clinical Oncology*. 2008;26(4):612–9.
- [6] Chaturvedi AK, Engels EA, Pfeiffer RM, Hernandez BY, Xiao W, Kim E, et al. Human papillomavirus and rising oropharyngeal cancer incidence in the United States. *Journal of Clinical Oncology*. 2011;29(32):4294–301.
- [7] Chaturvedi AK, Anderson WF, Lortet-Tieulent J, Paula Curado M, Ferlay J, Franceschi S, et al. Worldwide trends in incidence rates for oral cavity and oropharyngeal cancers. *Journal of Clinical Oncology*. 2013;31(36):4550–4559.
- [8] Chaturvedi AK, D’Souza G, Gillison ML, Katki HA. Burden of HPV-positive oropharynx cancers among ever and never smokers in the U.S. population. *Oral Oncology*. 2016;60:61–67.
- [9] Elam-Evans LD, Yankey D, Singleton JA, Sterrett N, Markowitz LE, Williams CL, et al. National, regional, state, and selected local area vaccination coverage among adolescents aged 13–17 years United States, 2019. *Morbidity and Mortality Weekly Report*. 2020;69(33):1109.

- 1  
2  
3 [10] Curry SJ, Krist AH, Owens DK, Barry MJ, Caughey AB, Davidson KW, et al. Screening for Cervical Cancer. *JAMA*.  
4 2018;320(7):674.  
5  
6  
7 [11] Giuliano AR, Lazcano-Ponce E, Villa LL, Flores R, Salmeron J, Lee JH, et al. The human papillomavirus infection in men study:  
8 human papillomavirus prevalence and type distribution among men residing in Brazil, Mexico, and the United States.  
9 *Cancer Epidemiology, Biomarkers & Prevention*. 2008;17(8):2036–43.  
10  
11  
12 [12] Eisenberg MC, Campredon LP, Brouwer AF, Walline HM, Marinelli BM, Lau YK, et al. Dynamics and Determinants of HPV  
13 Infection: The Michigan HPV and Oropharyngeal Cancer (M-HOC) Study. *BMJ Open*. 2018;8(10):e021618.  
14  
15  
16 [13] Brouwer AF, Campredon LP, Walline HM, Marinelli BM, Goudsmidt CM, Thomas TB, et al. Prevalence and determinants of  
17 oral and cervicogenital HPV infection: baseline analysis of the MHOC cohort study. *Submitted to BMJ Open*.  
18  
19  
20 [14] Harris PA, Taylor R, Thielke R, Payne J, Gonzalez N, Conde JG. Research electronic data capture (REDCap) a metadata-driven  
21 methodology and workflow process for providing translational research informatics support. *Journal of Biomedical*  
22 *Informatics*. 2009;42(2):377–381.  
23  
24  
25 [15] Harris PA, Taylor R, Minor BL, Elliott V, Fernandez M, O’Neal L, et al. The REDCap consortium: Building an international  
26 community of software platform partners. *Journal of Biomedical Informatics*. 2019;95:103208.  
27  
28  
29 [16] Walline HM, Komarck C, McHugh JB, Byrd SA, Spector ME, Hauff SJ, et al. High-risk human papillomavirus detection in  
30 oropharyngeal, nasopharyngeal, and oral cavity cancers comparison of multiple methods. *JAMA Otolaryngology - Head and*  
31 *Neck Surgery*. 2013;139(12):1320–7.  
32  
33  
34 [17] Durrett R. *Essentials of Stochastic Processes*. Springer; 1999.  
35  
36  
37 [18] Jackson CH. Multi-State Models for Panel Data: The msm Package for R. *Journal of Statistical Software*. 2011;38(8):1–29.  
38 Available from: <http://www.jstatsoft.org/v38/i08/>.  
39  
40  
41 [19] Kreimer AR, Campbell CMP, Lin HY, Fulp W, Papenfuss MR, Abrahamsen M, et al. Incidence and clearance of oral human  
42 papillomavirus infection in men: the HIM cohort study. *The Lancet*. 2013;382(9895):877–887.  
43  
44  
45 [20] Kero K, Rautava J, Syrjanen K, Willberg J, Grenman S, Syrj nen S. Smoking increases oral HPV persistence among men: 7-  
46 year follow-up study. *European Journal of Clinical Microbiology & Infectious Diseases*. 2014;33(1):123–33.  
47  
48  
49 [21] Louvanto K, Rautava J, Willberg J, Wideman L, Syrjanen K, Gr nenman S, et al. Genotype-specific incidence and clearance  
50 of human papillomavirus in oral mucosa of women: a six-year follow-up study. *PLoS One*. 2013;8(1):e53413.  
51  
52  
53 [22] Rautava J, Willberg J, Louvanto K, Wideman L, Syrjanen K, Gr nenman S, et al. Prevalence, Genotype Distribution and  
54 Persistence of Human Papillomavirus in Oral Mucosa of Women: A Six-Year Follow-Up Study. *PLOS ONE*. 2012;7(8):42171–  
55 42177.  
56  
57  
58  
59  
60

- 1  
2  
3 [23] Beachler DC, Sugar EA, Margolick JB, Weber KM, Strickler HD, Wiley DJ, et al. Risk factors for acquisition and clearance of  
4 oral human papillomavirus infection among HIV-infected and HIV-uninfected adults. *American Journal of Epidemiology*.  
5 2015;181(1):40–53.  
6  
7  
8 [24] Edelstein ZR, Schwartz SM, Hawes S, Hughes JP, Feng Q, Stern ME, et al. Rates and determinants of oral human  
9 papillomavirus infection in young men. *Sexually Transmitted Diseases*. 2012;39(11):860–7.  
10  
11  
12 [25] The prevalence and incidence of oral human papillomavirus infection among young men and women, aged 18-30 years.  
13 *Sexually Transmitted Diseases*. 2012;39(7):559–66.  
14  
15  
16 [26] Wood ZC, Bain CJ, Smith DD, Whiteman DC, Antonsson A. Oral human papillomavirus infection incidence and clearance: a  
17 systematic review of the literature. *Journal of General Virology*. 2017;98(4):519–526.  
18  
19  
20 [27] Taylor S, Bunge E, Bakker M, Castellsague X. The incidence, clearance and persistence of non-cervical human papillomavirus  
21 infections: a systematic review of the literature. *BMC infectious diseases*. 2016;16:293.  
22  
23  
24 [28] Goodman MT, Shvetsov YB, McDuffie K, Wilkens LR, Zhu X, Thompson PJ, et al. Prevalence, acquisition, and clearance of  
25 cervical human papillomavirus infection among women with normal cytology: Hawaii human papillomavirus cohort study.  
26 *Cancer Research*. 2008;68(21):8813–8824.  
27  
28  
29 [29] Moscicki AB, Shiboski S, Broering J, Powell K, Clayton L, Jay N, et al. The natural history of human papillomavirus infection  
30 as measured by repeated DNA testing in adolescent and young women. *The Journal of Pediatrics*. 1998;132(2):277–84.  
31  
32  
33 [30] Franco ELL, Villa LLL, Sobrinho JPP, Prado JMM, Rousseau MC, D'esy M, et al. Epidemiology of acquisition and clearance of  
34 cervical human papillomavirus infection in women from a high-risk area for cervical cancer. *Journal of Infectious Diseases*.  
35 1999;180(5):1415–23.  
36  
37  
38 [31] Molano M, Van den Brule A, Plummer M, Weiderpass E, Posso H, Arslan A, et al. Determinants of clearance of human  
39 papillomavirus infections in Colombian women with normal cytology: a population-based, 5-year follow-up study. *American*  
40 *Journal of Epidemiology*. 2003;158(5):486–94.  
41  
42  
43 [32] Munoz N, Mendez F, Posso H, Molano M, van den Brule AJC, Ronderos M, et al. Incidence, duration, and determinants  
44 of cervical human papillomavirus infection in a cohort of Colombian women with normal cytological results. *The Journal of*  
45 *Infectious Diseases*. 2004;190(12):2077–87.  
46  
47  
48 [33] Moscicki AB, Ma Y, Farhat S, Jay J, Hanson E, Benningfield S, et al. Natural History of Anal Human Papillomavirus Infection  
49 in Heterosexual Women and Risks Associated With Persistence. *Clinical Infectious Diseases*. 2014 mar;58(6):804–811.  
50  
51  
52 [34] El-Zein M, Ramanakumar AV, Naud P, Roteli-Martins CM, de Carvalho NS, Colares de Borba P, et al. Determinants of  
53 Acquisition and Clearance of Human Papillomavirus Infection in Previously Unexposed Young Women. *Sexually Transmitted*  
54 *Diseases*. 2019;46(10):663–669.  
55  
56  
57  
58  
59  
60

- 1  
2  
3 [35] Liu SH, Cummings DaT, Zenilman JM, Gravitt PE, Brotman RM. Characterizing the temporal dynamics of human  
4 papillomavirus DNA detectability using short-interval sampling. *Cancer Epidemiology Biomarkers and Prevention*.  
5 2014;23(1):200–208.  
6  
7  
8 [36] Chaturvedi AK, Graubard BI, Broutian T, Xiao W, Pickard RKL, Kahle L, et al. Prevalence of Oral HPV Infection in Unvaccinated  
9 Men and Women in the United States, 2009-2016. *JAMA*. 2019;322(10):977.  
10  
11  
12 [37] Hirth JM, Chang M, Resto VA, Guo F, Berenson AB. Prevalence of oral human papillomavirus by vaccination status among  
13 young adults (18–30 years old). *Vaccine*. 2017;35(27):3446–3451.  
14  
15  
16 [38] Brouwer AF, Eisenberg MC, Carey TE, Meza R. Multisite HPV infections in the United States (NHANES 20032014): An  
17 overview and synthesis. *Preventive Medicine*. 2019;123:288–298.  
18  
19  
20 [39] Beachler DC, Weber KM, Margolick JB, Strickler HD, Cranston RD, Burk RD, et al. Risk Factors for Oral HPV Infection among  
21 a High Prevalence Population of HIV-Positive and At-Risk HIV-Negative Adults. *Cancer Epidemiology Biomarkers &*  
22 *Prevention*. 2012;21(1):122–133.  
23  
24  
25 [40] D'Souza G, Cullen K, Bowie J, Thorpe R, Fakhry C. Differences in oral sexual behaviors by gender, age, and race explain  
26 observed differences in prevalence of oral human papillomavirus infection. *PLOS One*. 2014;9(1):e86023.  
27  
28  
29 [41] Klein TW, Newton C, Larsen K, Lu L, Perkins I, Nong L, Friedman H. The cannabinoid system and immune modulation. *Journal*  
30 *of leukocyte biology*. 2003;74(4):486-96.  
31  
32  
33 [42] Moscicki AB, Palefsky J, Gonzales J, Schoolnik GK. Human Papillomavirus Infection Sexually Active Adolescent Females:  
34 Prevalence and Risk Factors. *Pediatric Research*. 1990;28(5):507-13.  
35  
36  
37 [43] de Sanjose S, Almirall R, Lloveras B, Font R, Diaz M, Muñoz N, Català I, Meijer CJ, Snijders PJ, Herrero R, Bosch FX. Cervical  
38 human papillomavirus infection in the female population in Barcelona, Spain. *Sexually Transmitted Diseases*.  
39 2003;30(10):788-93.  
40  
41  
42 [44] Phelan DF, Gange SJ, Ahdieh-Grant L, Mehta SH, Kirk GD, Shah K, Gravitt P. Determinants of newly detected human  
43 papillomavirus infection in HIV-infected and HIV-uninfected injection drug using women. *Sexually Transmitted Diseases*.  
44 2009;36(3):149.  
45  
46  
47 [45] D'Souza G, Palefsky JM, Zhong Y, Minkoff H, Massad LS, Anastos K, Levine AM, Moxley M, Xue XN, Burk RD, Strickler HD.  
48 Marijuana use is not associated with cervical human papillomavirus natural history or cervical neoplasia in HIV-seropositive  
49 or HIV-seronegative women. *Cancer Epidemiology and Prevention Biomarkers*. 2010;19(3):869-72.  
50  
51  
52 [46] Legate N, Rogge RD. Identifying basic classes of sexual orientation with latent profile analysis: Developing the multivariate  
53 sexual orientation classification system. *Archives of sexual behavior*. 2019;48(5):1403-22.  
54  
55  
56  
57  
58  
59  
60

- 1  
2  
3 [47] Ranjeva SL, Baskerville EB, Dukic V, Villa LL, Lazcano-Ponce E, Giuliano AR, et al. Recurring infection with ecologically distinct  
4 HPV types can explain high prevalence and diversity. *Proceedings of the National Academy of Sciences*.  
5 2017;114(51):13573–13578.  
6  
7  
8 [48] Brouwer AF, Meza R, Eisenberg MC. Transmission heterogeneity and autoinoculation in a multisite infection model of HPV.  
9 *Mathematical Biosciences*. 2015;270:115–125.  
10  
11  
12 [49] Brouwer AF, Eisenberg MC, Meza R. Case Studies of Gastric, Lung, and Oral Cancer Connect Etiologic Agent Prevalence to  
13 Cancer Incidence. *Cancer Research*. 2018;78(12):3386–3397.  
14  
15  
16 [50] Hall MT, Simms KT, Lew JB, Smith MA, Brotherton JM, Saville M, et al. The projected timeframe until cervical cancer  
17 elimination in Australia: a modelling study. *The Lancet Public Health*. 2018;2667(18):1–9.  
18  
19  
20 [51] Ryser MD, Gravitt PE, Myers ER. Mechanistic mathematical models: An underused platform for HPV research.  
21 *Papillomavirus Research*. 2017;3:46–49.  
22  
23  
24  
25  
26  
27  
28  
29  
30  
31  
32  
33  
34  
35  
36  
37  
38  
39  
40  
41  
42  
43  
44  
45  
46  
47  
48  
49  
50  
51  
52  
53  
54  
55  
56  
57  
58  
59  
60

**Reality:** underlying continuous-time transition history

**Data:** observed states at specific times

**Model:** transition hazard rates

Infection states

1

2

HPV positive

3

4

5

HPV negative

6

7

8

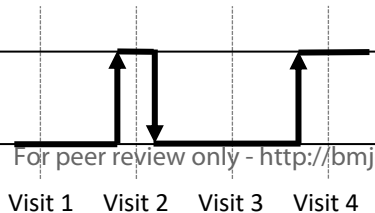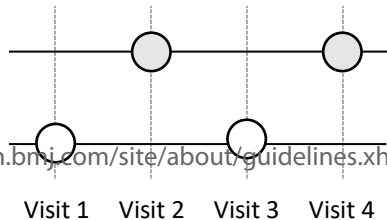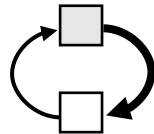



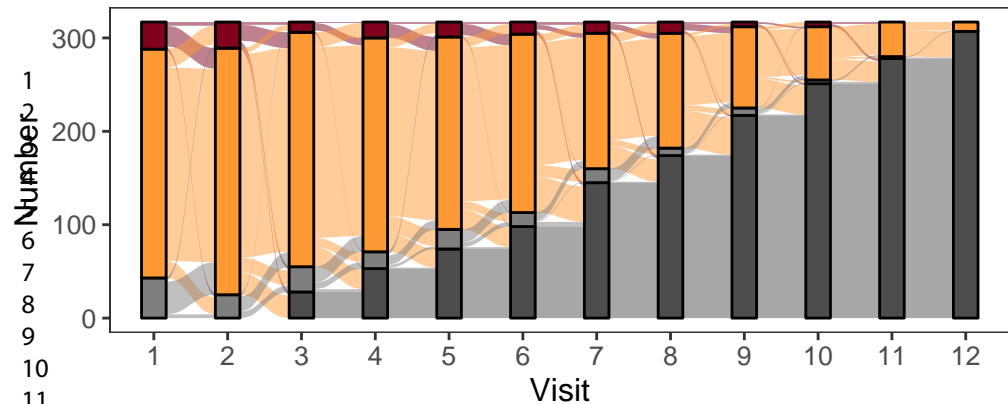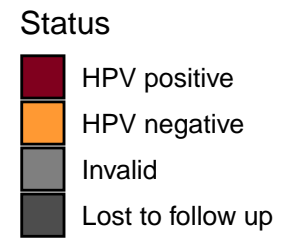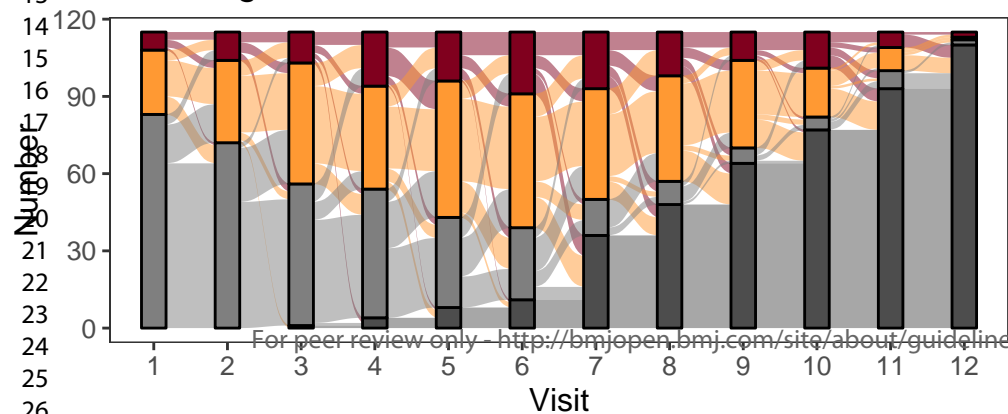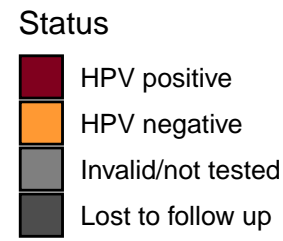

Table S1: Number of ever HPV positive participants and total number of positive tests overall and for each HPV genotype tested, for both the oral and cervicogenital tests.

| HPV Type | Oral                 |                                | Cervicogenital       |                                |
|----------|----------------------|--------------------------------|----------------------|--------------------------------|
|          | Number ever positive | Number of total positive tests | Number ever positive | Number of total positive tests |
| Any      | 110                  | 148                            | 81                   | 166                            |
| 6        | 25                   | 27                             | 13                   | 14                             |
| 11       | 2                    | 2                              | 0                    | 0                              |
| 16       | 38                   | 40                             | 7                    | 13                             |
| 18       | 37                   | 40                             | 9                    | 9                              |
| 31       | 4                    | 4                              | 1                    | 1                              |
| 33       | 2                    | 2                              | 0                    | 0                              |
| 35       | 1                    | 1                              | 2                    | 3                              |
| 39       | 6                    | 6                              | 12                   | 24                             |
| 45       | 2                    | 2                              | 3                    | 4                              |
| 51       | 3                    | 3                              | 7                    | 13                             |
| 52       | 4                    | 4                              | 11                   | 17                             |
| 56       | 10                   | 16                             | 13                   | 20                             |
| 58       | 7                    | 7                              | 3                    | 4                              |
| 59       | 3                    | 5                              | 30                   | 40                             |
| 66       | 10                   | 16                             | 59                   | 86                             |
| 68       | 0                    | 0                              | 0                    | 0                              |
| 73       | 5                    | 5                              | 10                   | 13                             |
| 90       | 11                   | 13                             | 39                   | 54                             |

STROBE Statement—Checklist of items that should be included in reports of *cohort studies*

|                           | Item No | Recommendation                                                                                                                                                                                    | Reported on page #     |
|---------------------------|---------|---------------------------------------------------------------------------------------------------------------------------------------------------------------------------------------------------|------------------------|
| <b>Title and abstract</b> | 1       | (a) Indicate the study's design with a commonly used term in the title or the abstract                                                                                                            | 1                      |
|                           |         | (b) Provide in the abstract an informative and balanced summary of what was done and what was found                                                                                               | 2                      |
| <b>Introduction</b>       |         |                                                                                                                                                                                                   |                        |
| Background/rationale      | 2       | Explain the scientific background and rationale for the investigation being reported                                                                                                              | 3                      |
| Objectives                | 3       | State specific objectives, including any prespecified hypotheses                                                                                                                                  | 3                      |
| <b>Methods</b>            |         |                                                                                                                                                                                                   |                        |
| Study design              | 4       | Present key elements of study design early in the paper                                                                                                                                           | 4 (also given in [12]) |
| Setting                   | 5       | Describe the setting, locations, and relevant dates, including periods of recruitment, exposure, follow-up, and data collection                                                                   | 4 (also given in [12]) |
| Participants              | 6       | (a) Give the eligibility criteria, and the sources and methods of selection of participants. Describe methods of follow-up                                                                        | 4 (also given in [12]) |
|                           |         | (b) For matched studies, give matching criteria and number of exposed and unexposed                                                                                                               | NA                     |
| Variables                 | 7       | Clearly define all outcomes, exposures, predictors, potential confounders, and effect modifiers. Give diagnostic criteria, if applicable                                                          | 5                      |
| Data sources/measurement  | 8*      | For each variable of interest, give sources of data and details of methods of assessment (measurement). Describe comparability of assessment methods if there is more than one group              | 5                      |
| Bias                      | 9       | Describe any efforts to address potential sources of bias                                                                                                                                         | 5                      |
| Study size                | 10      | Explain how the study size was arrived at                                                                                                                                                         | Given in [12]          |
| Quantitative variables    | 11      | Explain how quantitative variables were handled in the analyses. If applicable, describe which groupings were chosen and why                                                                      | 4                      |
| Statistical methods       | 12      | (a) Describe all statistical methods, including those used to control for confounding                                                                                                             | 5                      |
|                           |         | (b) Describe any methods used to examine subgroups and interactions                                                                                                                               | NA                     |
|                           |         | (c) Explain how missing data were addressed                                                                                                                                                       | 5                      |
|                           |         | (d) If applicable, explain how loss to follow-up was addressed                                                                                                                                    | 5                      |
|                           |         | (e) Describe any sensitivity analyses                                                                                                                                                             | NA                     |
| <b>Results</b>            |         |                                                                                                                                                                                                   |                        |
| Participants              | 13*     | (a) Report numbers of individuals at each stage of study—eg numbers potentially eligible, examined for eligibility, confirmed eligible, included in the study, completing follow-up, and analysed | 6                      |
|                           |         | (b) Give reasons for non-participation at each stage                                                                                                                                              | NA                     |
|                           |         | (c) Consider use of a flow diagram                                                                                                                                                                | Given in [12]          |
| Descriptive data          | 14*     | (a) Give characteristics of study participants (eg demographic, clinical, social) and information on exposures and potential confounders                                                          | 6-8                    |
|                           |         | (b) Indicate number of participants with missing data for each variable of                                                                                                                        | Table 1                |

|                          |     |                                                                                                                                                                                                              |             |
|--------------------------|-----|--------------------------------------------------------------------------------------------------------------------------------------------------------------------------------------------------------------|-------------|
|                          |     | interest                                                                                                                                                                                                     |             |
|                          |     | (c) Summarise follow-up time (eg, average and total amount)                                                                                                                                                  | 4, 6        |
| Outcome data             | 15* | Report numbers of outcome events or summary measures over time                                                                                                                                               | 6, 8        |
| Main results             | 16  | (a) Give unadjusted estimates and, if applicable, confounder-adjusted estimates and their precision (eg, 95% confidence interval). Make clear which confounders were adjusted for and why they were included | Table 2     |
|                          |     | (b) Report category boundaries when continuous variables were categorized                                                                                                                                    | Table 1 & 2 |
|                          |     | (c) If relevant, consider translating estimates of relative risk into absolute risk for a meaningful time period                                                                                             | NA          |
| Other analyses           | 17  | Report other analyses done—eg analyses of subgroups and interactions, and sensitivity analyses                                                                                                               | NA          |
| <b>Discussion</b>        |     |                                                                                                                                                                                                              |             |
| Key results              | 18  | Summarise key results with reference to study objectives                                                                                                                                                     | 11          |
| Limitations              | 19  | Discuss limitations of the study, taking into account sources of potential bias or imprecision. Discuss both direction and magnitude of any potential bias                                                   | 13          |
| Interpretation           | 20  | Give a cautious overall interpretation of results considering objectives, limitations, multiplicity of analyses, results from similar studies, and other relevant evidence                                   | 11-12       |
| Generalisability         | 21  | Discuss the generalisability (external validity) of the study results                                                                                                                                        | 11-12       |
| <b>Other information</b> |     |                                                                                                                                                                                                              |             |
| Funding                  | 22  | Give the source of funding and the role of the funders for the present study and, if applicable, for the original study on which the present article is based                                                | 13          |

\*Give information separately for exposed and unexposed groups.

**Note:** An Explanation and Elaboration article discusses each checklist item and gives methodological background and published examples of transparent reporting. The STROBE checklist is best used in conjunction with this article (freely available on the Web sites of PLoS Medicine at <http://www.plosmedicine.org/>, Annals of Internal Medicine at <http://www.annals.org/>, and Epidemiology at <http://www.epidem.com/>). Information on the STROBE Initiative is available at <http://www.strobe-statement.org>.
