# Supplementary material for: Incidence and clearance of oral and cervicogenital HPV infection: longitudinal analysis of the MHOC cohort study
Source: PubMed Central journal article supplement — BMJ Open. 2022 Jan 3;12(1):e056502. doi: 10.1136/bmjopen-2021-056502 (PMC8724815; doi:10.1136/bmjopen-2021-056502), 2022-01-03
Supplement: bmjopen-2021-056502supp001.pdf [file bmjopen-2021-056502supp001.pdf]

Table S1: Number of ever HPV positive participants and total number of positive tests overall and for each HPV genotype tested, for both the oral and cervicogenital tests.

| HPV Type | Oral                 |                                | Cervicogenital       |                                |
|----------|----------------------|--------------------------------|----------------------|--------------------------------|
|          | Number ever positive | Number of total positive tests | Number ever positive | Number of total positive tests |
| Any      | 110                  | 148                            | 81                   | 166                            |
| 6        | 25                   | 27                             | 13                   | 14                             |
| 11       | 2                    | 2                              | 0                    | 0                              |
| 16       | 38                   | 40                             | 7                    | 13                             |
| 18       | 37                   | 40                             | 9                    | 9                              |
| 31       | 4                    | 4                              | 1                    | 1                              |
| 33       | 2                    | 2                              | 0                    | 0                              |
| 35       | 1                    | 1                              | 2                    | 3                              |
| 39       | 6                    | 6                              | 12                   | 24                             |
| 45       | 2                    | 2                              | 3                    | 4                              |
| 51       | 3                    | 3                              | 7                    | 13                             |
| 52       | 4                    | 4                              | 11                   | 17                             |
| 56       | 10                   | 16                             | 13                   | 20                             |
| 58       | 7                    | 7                              | 3                    | 4                              |
| 59       | 3                    | 5                              | 30                   | 40                             |
| 66       | 10                   | 16                             | 59                   | 86                             |
| 68       | 0                    | 0                              | 0                    | 0                              |
| 73       | 5                    | 5                              | 10                   | 13                             |
| 90       | 11                   | 13                             | 39                   | 54                             |
